# Supplementary material for: The interplay between community and hospital Enterococcus faecium clones within health-care settings: a genomic analysis
Source: PubMed Central journal article supplement (PMC8810393; doi:10.1016/s2666-5247(21)00236-6), 2022-02
Supplement: mmc1.pdf [file mmc1.pdf]

# THE LANCET Microbe

## Supplementary appendix

This appendix formed part of the original submission and has been peer reviewed. We post it as supplied by the authors.

Supplement to: van Hal SJ, Willems RJJ, Gouliouri T, et al. The interplay between community and hospital *Enterococcus faecium* clones within health-care settings: a genomic analysis. *Lancet Microbe* 2022; published online Jan 18. [https://doi.org/10.1016/S2666-5247\(21\)00236-6](https://doi.org/10.1016/S2666-5247(21)00236-6).

Table of Contents

***Supplementary Figure 1: Recombination across E. faecium isolates. .... 2***  
***Supplementary Table 1: Isolate details ..... 3***  
***Supplementary Table 2: Gene proportions by hBAPs group..... 46***

Supplementary Figure 1: Recombination across *E. faecium* isolates.

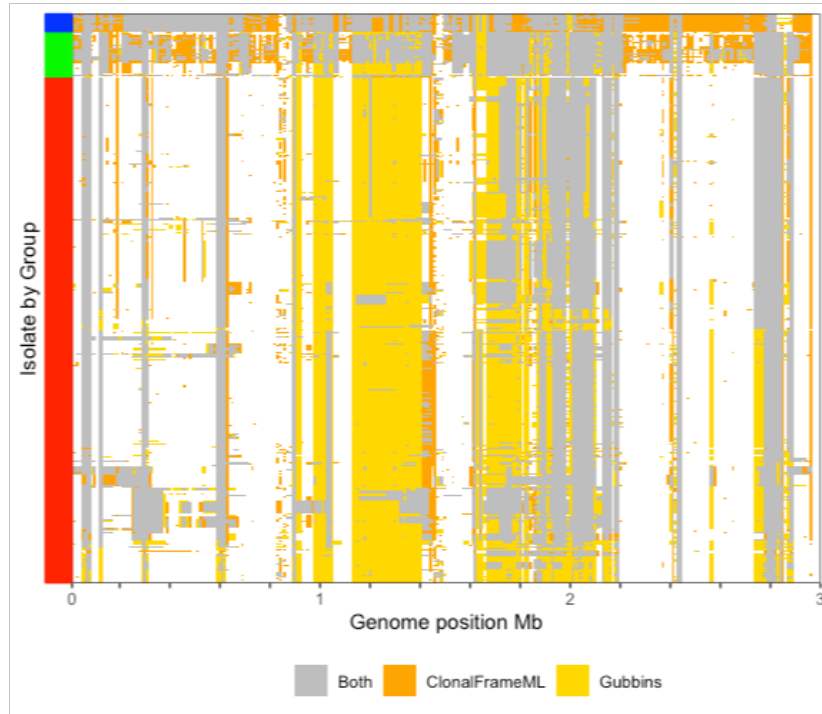

Recombination tracts identified using clonalFrameML and Gubbins across the genome for isolates grouped by hBAPs group. Grey depicts regions that were detected by both methods with orange and yellow tracts indicating regions detected by clonalFrameML and Gubbins alone respectively.

## Supplementary Table 1: Isolate details

| Study No. | BioProject  | BioSample    | Year <sup>1</sup> | Country <sup>2</sup> | Origin <sup>3</sup> | Gene <sup>4</sup> | hBAPs <sup>5</sup> | Host <sup>6</sup> |
|-----------|-------------|--------------|-------------------|----------------------|---------------------|-------------------|--------------------|-------------------|
| E0001     | PRJNA636894 | SAMN15088033 | 1997              | Spain                | Infection           | None              | B                  | Human             |
| E0002     | PRJNA636894 | SAMN15088034 | 2009              | Spain                | Screening           | None              | B                  | Human             |
| E0003     | PRJNA636894 | SAMN15088035 | 2009              | Spain                | Screening           | None              | B                  | Human             |
| E0004     | PRJNA636894 | SAMN15088036 | 1997              | Spain                | Infection           | None              | B                  | Human             |
| E0005     | PRJNA636894 | SAMN15088037 | 2009              | Spain                | Screening           | None              | B                  | Human             |
| E0006     | PRJNA636894 | SAMN15088038 | 2009              | Spain                | Screening           | None              | B                  | Human             |
| E0007     | PRJNA636894 | SAMN15088039 | 2009              | Spain                | Screening           | None              | B                  | Human             |
| E0008     | PRJNA636894 | SAMN15088040 | 2011              | Spain                | Infection           | None              | A1                 | Human             |
| E0009     | PRJNA636894 | SAMN15088041 | 2004              | Spain                | Infection           | None              | A1                 | Human             |
| E0010     | PRJNA636894 | SAMN15088042 | 2012              | Spain                | Infection           | None              | A1                 | Human             |
| E0011     | PRJNA636894 | SAMN15088043 | 2012              | Spain                | Infection           | None              | A1                 | Human             |
| E0012     | PRJNA636894 | SAMN15088044 | 2006              | Spain                | Infection           | None              | A1                 | Human             |
| E0013     | PRJNA636894 | SAMN15088045 | 2008              | Spain                | Infection           | None              | A1                 | Human             |
| E0014     | PRJNA636894 | SAMN15088046 | 2009              | Spain                | Infection           | None              | A1                 | Human             |
| E0015     | PRJNA636894 | SAMN15088047 | 2011              | Spain                | Screening           | None              | A2                 | Human             |
| E0016     | PRJNA636894 | SAMN15088048 | 2010              | Spain                | Screening           | None              | A2                 | Human             |
| E0017     | PRJNA636894 | SAMN15088049 | 2006              | Spain                | Infection           | None              | A2                 | Human             |
| E0018     | PRJNA636894 | SAMN15088050 | 2010              | Spain                | Infection           | None              | A1                 | Human             |
| E0019     | PRJNA636894 | SAMN15088051 | 2010              | Spain                | Infection           | None              | A1                 | Human             |
| E0020     | PRJNA636894 | SAMN15088052 | 2011              | Spain                | Infection           | None              | A1                 | Human             |
| E0021     | PRJNA636894 | SAMN15088053 | 2009              | Spain                | Screening           | None              | A2                 | Human             |
| E0022     | PRJNA636894 | SAMN15088054 | 2009              | Spain                | Screening           | None              | A2                 | Human             |
| E0023     | PRJNA636894 | SAMN15088055 | 2008              | Spain                | Infection           | None              | A2                 | Human             |

|       |             |              |         |              |           |      |    |       |
|-------|-------------|--------------|---------|--------------|-----------|------|----|-------|
| E0024 | PRJNA636894 | SAMN15088056 | 2009    | Spain        | Screening | None | A2 | Human |
| E0025 | PRJNA636894 | SAMN15088057 | 2010    | Spain        | Screening | None | A2 | Human |
| E0026 | PRJNA636894 | SAMN15088058 | 1999    | Spain        | Infection | None | A2 | Human |
| E0027 | PRJNA636894 | SAMN15088059 | 2010    | Spain        | Infection | None | A1 | Human |
| E0028 | PRJNA636894 | SAMN15088060 | 2010    | Spain        | Infection | None | A1 | Human |
| E0029 | PRJNA636894 | SAMN15088061 | 2011    | Spain        | Infection | None | A1 | Human |
| E0030 | PRJNA636894 | SAMN15088062 | 2010    | Spain        | Infection | None | A1 | Human |
| E0031 | PRJNA636894 | SAMN15088063 | 2011    | Spain        | Infection | vanB | A1 | Human |
| E0032 | PRJNA636894 | SAMN15088064 | 2009    | Spain        | Screening | None | A1 | Human |
| E0033 | PRJNA636894 | SAMN15088065 | 2010    | Spain        | Infection | None | A2 | Human |
| E0034 | PRJNA636894 | SAMN15088066 | 2011    | Spain        | Infection | None | A2 | Human |
| E0035 | PRJNA636894 | SAMN15088067 | 1995    | Spain        | Infection | None | A2 | Human |
| E0036 | PRJNA636894 | SAMN15088068 | 1995    | Spain        | Infection | None | A2 | Human |
| E0037 | PRJNA636894 | SAMN15088069 | 2009    | Spain        | Screening | None | A1 | Human |
| E0038 | PRJNA636894 | SAMN15088070 | 2002    | Portugal     | Infection | vanA | A1 | Human |
| E0039 | PRJNA636894 | SAMN15088071 | 2004    | Singapore    | Unknown   | vanB | A1 | Human |
| E0040 | PRJNA636894 | SAMN15088072 | 1997    | Australia    | Infection | vanA | A1 | Human |
| E0041 | PRJNA636894 | SAMN15088073 | 2000    | Argentina    | Screening | vanA | A1 | Human |
| E0042 | PRJNA636894 | SAMN15088074 | 1992    | USA          | Unknown   | vanA | A1 | Human |
| E0043 | PRJNA636894 | SAMN15088075 | 1997    | Argentina    | Screening | vanA | A1 | Human |
| E0044 | PRJNA636894 | SAMN15088076 | 2009    | Spain        | Infection | vanA | A1 | Human |
| E0045 | PRJNA636894 | SAMN15088077 | 1996    | Finland      | Unknown   | vanA | A1 | Human |
| E0046 | PRJNA636894 | SAMN15088078 | 2003    | Spain        | Infection | vanA | A1 | Human |
| E0047 | PRJNA636894 | SAMN15088079 | 2000    | Saudi Arabia | Unknown   | vanA | A1 | Human |
| E0048 | PRJNA636894 | SAMN15088080 | 2003    | Tunisia      | Unknown   | vanA | A1 | Human |
| E0049 | PRJNA636894 | SAMN15088081 | Unknown | Brazil       | Unknown   | vanA | A1 | Human |
| E0050 | PRJNA636894 | SAMN15088082 | 1991    | USA          | Unknown   | vanB | A1 | Human |

|       |             |              |         |              |           |      |    |       |
|-------|-------------|--------------|---------|--------------|-----------|------|----|-------|
| E0051 | PRJNA636894 | SAMN15088083 | 2004    | Spain        | Infection | vanB | A1 | Human |
| E0052 | PRJNA636894 | SAMN15088084 | 2005    | Spain        | Infection | vanB | A1 | Human |
| E0053 | PRJNA636894 | SAMN15088085 | 2006    | Spain        | Infection | vanB | A1 | Human |
| E0054 | PRJNA636894 | SAMN15088086 | 2004    | Spain        | Unknown   | vanB | A1 | Human |
| E0055 | PRJNA636894 | SAMN15088087 | 2005    | Poland       | Infection | vanA | A1 | Human |
| E0056 | PRJNA636894 | SAMN15088088 | 2006    | Germany      | Infection | vanA | A1 | Human |
| E0057 | PRJNA636894 | SAMN15088089 | 2002    | Italy        | Infection | vanB | A1 | Human |
| E0058 | PRJNA636894 | SAMN15088090 | 2000    | Saudi Arabia | Unknown   | vanA | A1 | Human |
| E0059 | PRJNA636894 | SAMN15088091 | Unknown | Portugal     | Unknown   | vanA | A1 | Human |
| E0060 | PRJNA636894 | SAMN15088092 | 2005    | Denmark      | Unknown   | vanA | A1 | Human |
| E0061 | PRJNA636894 | SAMN15088093 | 2005    | Poland       | Screening | vanA | A1 | Human |
| E0062 | PRJNA636894 | SAMN15088094 | 2003    | Chile        | Infection | vanB | A1 | Human |
| E0063 | PRJNA636894 | SAMN15088095 | 2004    | Chile        | Infection | vanB | A1 | Human |
| E0064 | PRJNA636894 | SAMN15088096 | 1999    | Portugal     | Infection | vanA | A1 | Human |
| E0065 | PRJNA636894 | SAMN15088097 | 2002    | Portugal     | Infection | vanA | A1 | Human |
| E0066 | PRJNA636894 | SAMN15088098 | 2001    | Australia    | Unknown   | vanB | A1 | Human |
| E0067 | PRJNA636894 | SAMN15088099 | 1998    | Argentina    | Screening | vanA | A1 | Human |
| E0068 | PRJNA636894 | SAMN15088100 | 2001    | Italy        | Infection | vanA | A1 | Human |
| E0069 | PRJNA636894 | SAMN15088101 | 2005    | Spain        | Screening | vanA | A1 | Human |
| E0070 | PRJNA636894 | SAMN15088102 | 2006    | Spain        | Unknown   | vanA | A1 | Human |
| E0071 | PRJNA636894 | SAMN15088103 | 2005    | Paraguay     | Unknown   | vanA | A1 | Human |
| E0072 | PRJNA636894 | SAMN15088104 | 1998    | Germany      | Infection | vanA | A1 | Human |
| E0073 | PRJNA636894 | SAMN15088105 | 2008    | Spain        | Infection | vanA | A1 | Human |
| E0074 | PRJNA636894 | SAMN15088106 | 2004    | Germany      | Infection | vanA | A1 | Human |
| E0075 | PRJNA636894 | SAMN15088107 | 2004    | USA          | Unknown   | vanA | A1 | Human |
| E0076 | PRJNA636894 | SAMN15088108 | 2005    | Germany      | Infection | vanA | A1 | Human |
| E0077 | PRJNA636894 | SAMN15088109 | 2005    | Denmark      | Unknown   | vanB | A1 | Human |

|       |             |              |         |              |           |      |    |       |
|-------|-------------|--------------|---------|--------------|-----------|------|----|-------|
| E0078 | PRJNA636894 | SAMN15088110 | 2000    | Saudi Arabia | Unknown   | vanA | A2 | Human |
| E0079 | PRJNA636894 | SAMN15088111 | 2005    | Canada       | Unknown   | vanA | A1 | Human |
| E0080 | PRJNA636894 | SAMN15088112 | 2006    | Paraguay     | Unknown   | vanA | A1 | Human |
| E0081 | PRJNA636894 | SAMN15088113 | 2002    | Portugal     | Infection | vanA | A2 | Human |
| E0082 | PRJNA636894 | SAMN15088114 | Unknown | Brazil       | Unknown   | vanA | A1 | Human |
| E0083 | PRJNA636894 | SAMN15088115 | 1987    | France       | Screening | vanA | A2 | Human |
| E0084 | PRJNA636894 | SAMN15088116 | 1998    | Spain        | Infection | vanB | A1 | Human |
| E0085 | PRJNA636894 | SAMN15088117 | 1996    | Finland      | Unknown   | vanB | A1 | Human |
| E0086 | PRJNA636894 | SAMN15088118 | 2002    | Spain        | Infection | vanB | A1 | Human |
| E0087 | PRJNA636894 | SAMN15088119 | 2005    | Spain        | Infection | vanA | A1 | Human |
| E0088 | PRJNA636894 | SAMN15088120 | Unknown | Spain        | Unknown   | vanA | A1 | Human |
| E0089 | PRJNA636894 | SAMN15088121 | 2005    | Spain        | Unknown   | vanA | A1 | Human |
| E0090 | PRJNA636894 | SAMN15088122 | 2005    | Spain        | Unknown   | vanA | A1 | Human |
| E0091 | PRJNA636894 | SAMN15088123 | 2009    | Spain        | Infection | vanA | A1 | Human |
| E0092 | PRJNA636894 | SAMN15088124 | 2003    | Spain        | Infection | vanB | A1 | Human |
| E0093 | PRJNA636894 | SAMN15088125 | 2004    | Spain        | Infection | vanB | A1 | Human |
| E0094 | PRJNA636894 | SAMN15088126 | 1999    | Spain        | Infection | vanA | A1 | Human |
| E0095 | PRJNA636894 | SAMN15088127 | 2005    | Spain        | Unknown   | vanA | A1 | Human |
| E0096 | PRJNA336433 | SAMN05510547 | 2015    | Australia    | Unknown   | vanA | A1 | Human |
| E0097 | PRJNA336433 | SAMN05510548 | 2015    | Australia    | Unknown   | vanA | A1 | Human |
| E0098 | PRJNA336433 | SAMN05510549 | 2015    | Australia    | Unknown   | vanB | A1 | Human |
| E0099 | PRJNA336433 | SAMN05510550 | 2015    | Australia    | Unknown   | vanB | A1 | Human |
| E0100 | PRJNA336433 | SAMN05510551 | 2015    | Australia    | Unknown   | vanA | A1 | Human |
| E0101 | PRJNA336433 | SAMN05510552 | 2015    | Australia    | Unknown   | vanB | A1 | Human |
| E0102 | PRJNA336433 | SAMN05510553 | 2015    | Australia    | Unknown   | vanB | A1 | Human |
| E0103 | PRJNA336433 | SAMN05510554 | 2015    | Australia    | Unknown   | vanB | A1 | Human |
| E0104 | PRJNA336433 | SAMN05510555 | 2015    | Australia    | Unknown   | vanB | A1 | Human |

|       |             |              |      |           |         |      |    |       |
|-------|-------------|--------------|------|-----------|---------|------|----|-------|
| E0105 | PRJNA336433 | SAMN05510556 | 2015 | Australia | Unknown | vanA | A1 | Human |
| E0106 | PRJNA336433 | SAMN05510557 | 2015 | Australia | Unknown | vanB | A1 | Human |
| E0107 | PRJNA336433 | SAMN05510558 | 2015 | Australia | Unknown | vanA | A1 | Human |
| E0108 | PRJNA336433 | SAMN05510559 | 2015 | Australia | Unknown | vanB | A1 | Human |
| E0109 | PRJNA336433 | SAMN05510560 | 2015 | Australia | Unknown | vanB | A1 | Human |
| E0110 | PRJNA336433 | SAMN05510561 | 2015 | Australia | Unknown | vanA | A1 | Human |
| E0111 | PRJNA336433 | SAMN05510562 | 2015 | Australia | Unknown | vanA | A1 | Human |
| E0112 | PRJNA336433 | SAMN05510563 | 2015 | Australia | Unknown | vanB | A1 | Human |
| E0113 | PRJNA336433 | SAMN05510564 | 2015 | Australia | Unknown | vanB | A1 | Human |
| E0114 | PRJNA336433 | SAMN05510565 | 2015 | Australia | Unknown | vanB | A1 | Human |
| E0115 | PRJNA336433 | SAMN05510566 | 2015 | Australia | Unknown | vanB | A1 | Human |
| E0116 | PRJNA336433 | SAMN05510567 | 2015 | Australia | Unknown | vanB | A1 | Human |
| E0117 | PRJNA336433 | SAMN05510568 | 2015 | Australia | Unknown | vanB | A1 | Human |
| E0118 | PRJNA336433 | SAMN05510569 | 2015 | Australia | Unknown | vanB | A1 | Human |
| E0119 | PRJNA336433 | SAMN05510570 | 2015 | Australia | Unknown | vanB | A1 | Human |
| E0120 | PRJNA336433 | SAMN05510571 | 2015 | Australia | Unknown | vanB | A1 | Human |
| E0121 | PRJNA336433 | SAMN05510572 | 2015 | Australia | Unknown | vanB | A1 | Human |
| E0122 | PRJNA336433 | SAMN05510573 | 2015 | Australia | Unknown | vanA | A1 | Human |
| E0123 | PRJNA336433 | SAMN05510574 | 2015 | Australia | Unknown | vanB | A1 | Human |
| E0124 | PRJNA336433 | SAMN05510575 | 2015 | Australia | Unknown | vanB | A1 | Human |
| E0125 | PRJNA336433 | SAMN05510576 | 2015 | Australia | Unknown | vanB | A1 | Human |
| E0126 | PRJNA336433 | SAMN05510577 | 2015 | Australia | Unknown | vanB | A1 | Human |
| E0127 | PRJNA336433 | SAMN05510578 | 2015 | Australia | Unknown | vanA | A1 | Human |
| E0128 | PRJNA336433 | SAMN05510579 | 2015 | Australia | Unknown | vanB | A1 | Human |
| E0129 | PRJNA336433 | SAMN05510580 | 2015 | Australia | Unknown | vanB | A1 | Human |
| E0130 | PRJNA336433 | SAMN05510581 | 2015 | Australia | Unknown | vanB | A1 | Human |
| E0131 | PRJNA336433 | SAMN05510582 | 2015 | Australia | Unknown | vanB | A1 | Human |



|       |             |              |      |           |         |      |    |       |
|-------|-------------|--------------|------|-----------|---------|------|----|-------|
| E0132 | PRJNA336433 | SAMN05510583 | 2015 | Australia | Unknown | vanA | A1 | Human |
| E0133 | PRJNA336433 | SAMN05510584 | 2015 | Australia | Unknown | vanA | A1 | Human |
| E0134 | PRJNA336433 | SAMN05510585 | 2015 | Australia | Unknown | vanB | A1 | Human |
| E0135 | PRJNA336433 | SAMN05510586 | 2015 | Australia | Unknown | vanB | A1 | Human |
| E0136 | PRJNA336433 | SAMN05510587 | 2015 | Australia | Unknown | vanB | A1 | Human |
| E0137 | PRJNA336433 | SAMN05510588 | 2015 | Australia | Unknown | vanA | A1 | Human |
| E0138 | PRJNA336433 | SAMN05510589 | 2015 | Australia | Unknown | vanB | A1 | Human |
| E0139 | PRJNA336433 | SAMN05510590 | 2015 | Australia | Unknown | vanB | A1 | Human |
| E0140 | PRJNA336433 | SAMN05510591 | 2015 | Australia | Unknown | vanB | A1 | Human |
| E0141 | PRJNA336433 | SAMN05510592 | 2015 | Australia | Unknown | vanA | A1 | Human |
| E0142 | PRJNA336433 | SAMN05510593 | 2015 | Australia | Unknown | vanA | A1 | Human |
| E0143 | PRJNA336433 | SAMN05510594 | 2015 | Australia | Unknown | vanB | A1 | Human |
| E0144 | PRJNA336433 | SAMN05510595 | 2015 | Australia | Unknown | vanB | A1 | Human |
| E0145 | PRJNA336433 | SAMN05510596 | 2015 | Australia | Unknown | vanB | A1 | Human |
| E0146 | PRJNA336433 | SAMN05510597 | 2015 | Australia | Unknown | vanB | A1 | Human |
| E0147 | PRJNA336433 | SAMN05510598 | 2015 | Australia | Unknown | vanB | A1 | Human |
| E0148 | PRJNA336433 | SAMN05510599 | 2015 | Australia | Unknown | vanA | A1 | Human |
| E0149 | PRJNA336433 | SAMN05510600 | 2015 | Australia | Unknown | vanB | A1 | Human |
| E0150 | PRJNA336433 | SAMN05510601 | 2015 | Australia | Unknown | vanB | A1 | Human |
| E0151 | PRJNA336433 | SAMN05510602 | 2015 | Australia | Unknown | vanB | A1 | Human |
| E0152 | PRJNA336433 | SAMN05510603 | 2015 | Australia | Unknown | vanA | A1 | Human |
| E0153 | PRJNA336433 | SAMN05510604 | 2015 | Australia | Unknown | vanB | A1 | Human |
| E0154 | PRJNA336433 | SAMN05510605 | 2015 | Australia | Unknown | vanB | A1 | Human |
| E0155 | PRJNA336433 | SAMN05510606 | 2015 | Australia | Unknown | vanA | A1 | Human |
| E0156 | PRJNA336433 | SAMN05510607 | 2015 | Australia | Unknown | vanB | A1 | Human |
| E0157 | PRJNA336433 | SAMN05510608 | 2015 | Australia | Unknown | vanB | A1 | Human |
| E0158 | PRJNA336433 | SAMN05510609 | 2015 | Australia | Unknown | vanB | A1 | Human |

|       |             |              |      |           |         |      |    |       |
|-------|-------------|--------------|------|-----------|---------|------|----|-------|
| E0159 | PRJNA336433 | SAMN05510610 | 2015 | Australia | Unknown | vanB | A1 | Human |
| E0160 | PRJNA336433 | SAMN05510611 | 2015 | Australia | Unknown | vanB | A1 | Human |
| E0161 | PRJNA336433 | SAMN05510612 | 2015 | Australia | Unknown | vanB | A1 | Human |
| E0162 | PRJNA336433 | SAMN05510613 | 2015 | Australia | Unknown | vanB | A1 | Human |
| E0163 | PRJNA336433 | SAMN05510614 | 2015 | Australia | Unknown | vanB | A1 | Human |
| E0164 | PRJNA336433 | SAMN05510615 | 2015 | Australia | Unknown | vanB | A1 | Human |
| E0165 | PRJNA336433 | SAMN05510616 | 2015 | Australia | Unknown | vanB | A1 | Human |
| E0166 | PRJNA336433 | SAMN05510617 | 2015 | Australia | Unknown | vanB | A1 | Human |
| E0167 | PRJNA336433 | SAMN05510618 | 2015 | Australia | Unknown | vanB | A1 | Human |
| E0168 | PRJNA336433 | SAMN05510619 | 2015 | Australia | Unknown | vanB | A1 | Human |
| E0169 | PRJNA336433 | SAMN05510620 | 2015 | Australia | Unknown | vanB | A1 | Human |
| E0170 | PRJNA336433 | SAMN05510621 | 2015 | Australia | Unknown | vanB | A1 | Human |
| E0171 | PRJNA336433 | SAMN05510622 | 2015 | Australia | Unknown | vanB | A1 | Human |
| E0172 | PRJNA336433 | SAMN05510623 | 2015 | Australia | Unknown | vanB | A1 | Human |
| E0173 | PRJNA336433 | SAMN05510624 | 2015 | Australia | Unknown | vanA | A1 | Human |
| E0174 | PRJNA336433 | SAMN05510625 | 2015 | Australia | Unknown | vanB | A1 | Human |
| E0175 | PRJNA336433 | SAMN05510626 | 2015 | Australia | Unknown | vanB | A1 | Human |
| E0176 | PRJNA336433 | SAMN05510627 | 2015 | Australia | Unknown | vanB | A1 | Human |
| E0177 | PRJNA336433 | SAMN05510628 | 2015 | Australia | Unknown | vanA | A1 | Human |
| E0178 | PRJNA336433 | SAMN05510629 | 2015 | Australia | Unknown | vanB | A1 | Human |
| E0179 | PRJNA336433 | SAMN05510630 | 2015 | Australia | Unknown | vanB | A1 | Human |
| E0180 | PRJNA336433 | SAMN05510631 | 2015 | Australia | Unknown | vanB | A1 | Human |
| E0181 | PRJNA336433 | SAMN05510632 | 2015 | Australia | Unknown | vanB | A1 | Human |
| E0182 | PRJNA336433 | SAMN05510633 | 2015 | Australia | Unknown | vanB | A1 | Human |
| E0183 | PRJNA336433 | SAMN05510634 | 2015 | Australia | Unknown | vanB | A1 | Human |
| E0184 | PRJNA336433 | SAMN05510635 | 2015 | Australia | Unknown | vanB | A1 | Human |
| E0185 | PRJNA336433 | SAMN05510636 | 2015 | Australia | Unknown | vanA | A1 | Human |

|       |             |              |      |           |           |      |    |       |
|-------|-------------|--------------|------|-----------|-----------|------|----|-------|
| E0186 | PRJNA336433 | SAMN05510637 | 2015 | Australia | Unknown   | vanB | A1 | Human |
| E0187 | PRJNA336433 | SAMN05510638 | 2015 | Australia | Unknown   | vanB | A1 | Human |
| E0188 | PRJNA336433 | SAMN05510639 | 2015 | Australia | Unknown   | vanB | A1 | Human |
| E0189 | PRJNA336433 | SAMN05510640 | 2015 | Australia | Unknown   | vanB | A1 | Human |
| E0190 | PRJNA336433 | SAMN05510641 | 2015 | Australia | Unknown   | vanB | A1 | Human |
| E0191 | PRJNA336433 | SAMN05510642 | 2015 | Australia | Unknown   | vanB | A1 | Human |
| E0192 | PRJNA336433 | SAMN05510643 | 2015 | Australia | Unknown   | vanB | A1 | Human |
| E0193 | PRJNA336433 | SAMN05510644 | 2015 | Australia | Unknown   | vanB | A1 | Human |
| E0194 | PRJNA336433 | SAMN05510645 | 2015 | Australia | Unknown   | vanB | A1 | Human |
| E0195 | PRJNA336433 | SAMN05510646 | 2015 | Australia | Unknown   | vanB | A1 | Human |
| E0196 | PRJNA205886 | SAMN02318071 | 1999 | Australia | Infection | vanB | A1 | Human |
| E0197 | PRJNA205886 | SAMN02318157 | 1999 | Australia | Infection | None | A1 | Human |
| E0198 | PRJNA205886 | SAMN02318072 | 2000 | Australia | Infection | None | A2 | Human |
| E0199 | PRJNA205886 | SAMN02318158 | 2000 | Australia | Infection | vanB | A1 | Human |
| E0200 | PRJNA205886 | SAMN02318073 | 2002 | Australia | Infection | None | A1 | Human |
| E0201 | PRJNA205886 | SAMN02318074 | 2003 | Australia | Infection | vanB | A1 | Human |
| E0202 | PRJNA205886 | SAMN02318075 | 2003 | Australia | Infection | None | A1 | Human |
| E0203 | PRJNA205886 | SAMN02318159 | 2004 | Australia | Infection | None | A1 | Human |
| E0204 | PRJNA205886 | SAMN02318076 | 2004 | Australia | Infection | vanB | A1 | Human |
| E0205 | PRJNA205886 | SAMN02318077 | 2005 | Australia | Infection | None | A1 | Human |
| E0206 | PRJNA205886 | SAMN02318078 | 2005 | Australia | Infection | vanB | A1 | Human |
| E0207 | PRJNA205886 | SAMN02318160 | 2005 | Australia | Infection | vanB | A1 | Human |
| E0208 | PRJNA205886 | SAMN02318079 | 2006 | Australia | Infection | None | A1 | Human |
| E0209 | PRJNA205886 | SAMN02318161 | 2006 | Australia | Infection | None | A1 | Human |
| E0210 | PRJNA205886 | SAMN02318080 | 2006 | Australia | Infection | None | A1 | Human |
| E0211 | PRJNA205886 | SAMN02318162 | 2006 | Australia | Infection | None | A1 | Human |
| E0212 | PRJNA205886 | SAMN02318163 | 2007 | Australia | Infection | vanB | A1 | Human |

|       |             |              |      |           |           |      |    |       |
|-------|-------------|--------------|------|-----------|-----------|------|----|-------|
| E0213 | PRJNA205886 | SAMN02318081 | 2007 | Australia | Infection | vanB | A1 | Human |
| E0214 | PRJNA205886 | SAMN02318164 | 2007 | Australia | Infection | vanB | A1 | Human |
| E0215 | PRJNA205886 | SAMN02318166 | 2007 | Australia | Infection | None | A1 | Human |
| E0216 | PRJNA205886 | SAMN02318167 | 2007 | Australia | Infection | vanB | A1 | Human |
| E0217 | PRJNA205886 | SAMN02318169 | 2007 | Australia | Infection | None | A1 | Human |
| E0218 | PRJNA205886 | SAMN02318170 | 2008 | Australia | Infection | None | A1 | Human |
| E0219 | PRJNA205886 | SAMN02318171 | 2008 | Australia | Infection | None | A1 | Human |
| E0220 | PRJNA205886 | SAMN02318172 | 2008 | Australia | Infection | None | A1 | Human |
| E0221 | PRJNA205886 | SAMN02318174 | 2008 | Australia | Infection | vanB | A1 | Human |
| E0222 | PRJNA205886 | SAMN02318175 | 2008 | Australia | Infection | vanB | A1 | Human |
| E0223 | PRJNA205886 | SAMN02318176 | 2008 | Australia | Infection | vanB | A1 | Human |
| E0224 | PRJNA205886 | SAMN02318180 | 2008 | Australia | Infection | None | A1 | Human |
| E0225 | PRJNA205886 | SAMN02318181 | 2008 | Australia | Infection | None | A1 | Human |
| E0226 | PRJNA205886 | SAMN02318182 | 2009 | Australia | Infection | vanB | A1 | Human |
| E0227 | PRJNA205886 | SAMN02318183 | 2009 | Australia | Infection | vanB | A1 | Human |
| E0228 | PRJNA205886 | SAMN02318185 | 2009 | Australia | Infection | vanB | A1 | Human |
| E0229 | PRJNA205886 | SAMN02318082 | 2009 | Australia | Infection | vanB | A1 | Human |
| E0230 | PRJNA205886 | SAMN02318188 | 1999 | Australia | Infection | None | A2 | Human |
| E0231 | PRJNA205886 | SAMN02318084 | 2009 | Australia | Infection | None | A1 | Human |
| E0232 | PRJNA205886 | SAMN02318087 | 2003 | Australia | Infection | None | A1 | Human |
| E0233 | PRJNA205886 | SAMN02318088 | 2000 | Australia | Infection | None | A1 | Human |
| E0234 | PRJNA205886 | SAMN02318089 | 2000 | Australia | Infection | None | A2 | Human |
| E0235 | PRJNA205886 | SAMN02318091 | 2010 | Australia | Screening | None | A1 | Human |
| E0236 | PRJNA205886 | SAMN02318189 | 2010 | Australia | Screening | vanB | A1 | Human |
| E0237 | PRJNA205886 | SAMN02318092 | 2010 | Australia | Screening | vanB | A1 | Human |
| E0238 | PRJEB28731  | SAMEA5367834 | 2015 | Denmark   | Screening | vanA | A1 | Human |
| E0239 | PRJEB28731  | SAMEA5367835 | 2015 | Denmark   | Screening | vanA | A1 | Human |

|       |             |              |      |         |           |      |    |       |
|-------|-------------|--------------|------|---------|-----------|------|----|-------|
| E0240 | PRJEB28731  | SAMEA5367854 | 2015 | Denmark | Screening | vanA | A1 | Human |
| E0241 | PRJEB28731  | SAMEA5367873 | 2015 | Denmark | Screening | vanA | A1 | Human |
| E0242 | PRJEB28731  | SAMEA5367874 | 2015 | Denmark | Screening | vanA | A1 | Human |
| E0243 | PRJEB28731  | SAMEA5367880 | 2015 | Denmark | Screening | vanA | A1 | Human |
| E0244 | PRJEB28731  | SAMEA5367909 | 2015 | Denmark | Screening | vanA | A1 | Human |
| E0245 | PRJEB28731  | SAMEA5367918 | 2015 | Denmark | Screening | vanA | A1 | Human |
| E0246 | PRJEB28731  | SAMEA5367922 | 2013 | Denmark | Screening | vanA | A1 | Human |
| E0247 | PRJEB28731  | SAMEA4937746 | 2015 | Denmark | Screening | vanA | A1 | Human |
| E0248 | PRJEB28731  | SAMEA5367953 | 2015 | Denmark | Screening | vanA | A1 | Human |
| E0249 | PRJNA636894 | SAMN15088128 | 2015 | Denmark | Infection | vanA | A1 | Human |
| E0250 | PRJEB28731  | SAMEA5367998 | 2015 | Denmark | Infection | vanA | A1 | Human |
| E0251 | PRJEB28731  | SAMEA5368005 | 2013 | Denmark | Screening | vanA | A1 | Human |
| E0252 | PRJEB28731  | SAMEA5368007 | 2013 | Denmark | Screening | vanA | A1 | Human |
| E0253 | PRJEB28731  | SAMEA5368009 | 2013 | Denmark | Screening | vanA | A1 | Human |
| E0254 | PRJEB28731  | SAMEA5368026 | 2013 | Denmark | Infection | vanA | A1 | Human |
| E0255 | PRJEB28731  | SAMEA5368039 | 2013 | Denmark | Infection | vanA | A1 | Human |
| E0256 | PRJEB28731  | SAMEA5368041 | 2013 | Denmark | Screening | vanA | A1 | Human |
| E0257 | PRJEB28731  | SAMEA5368053 | 2013 | Denmark | Infection | vanA | A1 | Human |
| E0258 | PRJEB14640  | SAMEA4052470 | 2012 | Denmark | Infection | vanA | A2 | Human |
| E0259 | PRJEB28731  | SAMEA5368059 | 2013 | Denmark | Infection | vanA | A1 | Human |
| E0260 | PRJEB28731  | SAMEA5368060 | 2013 | Denmark | Infection | vanA | A1 | Human |
| E0261 | PRJEB28731  | SAMEA5368061 | 2013 | Denmark | Infection | vanA | A1 | Human |
| E0262 | PRJEB28731  | SAMEA4937740 | 2012 | Denmark | Infection | vanA | A1 | Human |
| E0263 | PRJEB14636  | SAMEA4052466 | 2013 | Denmark | Screening | vanA | A1 | Human |
| E0264 | PRJEB28731  | SAMEA5368098 | 2013 | Denmark | Screening | vanA | A1 | Human |
| E0265 | PRJEB28731  | SAMEA5368114 | 2014 | Denmark | Infection | vanA | A1 | Human |
| E0266 | PRJEB28731  | SAMEA5368119 | 2014 | Denmark | Screening | vanA | A1 | Human |

|       |             |              |      |         |           |      |    |       |
|-------|-------------|--------------|------|---------|-----------|------|----|-------|
| E0267 | PRJEB14632  | SAMEA4052462 | 2014 | Denmark | Screening | vanA | A1 | Human |
| E0268 | PRJEB28731  | SAMEA5368154 | 2014 | Denmark | Screening | vanA | A1 | Human |
| E0269 | PRJEB28731  | SAMEA5368158 | 2012 | Denmark | Infection | vanA | A1 | Human |
| E0270 | PRJEB28731  | SAMEA5368159 | 2014 | Denmark | Infection | vanA | A1 | Human |
| E0271 | PRJNA636894 | SAMN15088129 | 2014 | Denmark | Screening | vanA | A1 | Human |
| E0272 | PRJEB14635  | SAMEA4052465 | 2014 | Denmark | Screening | vanA | A1 | Human |
| E0273 | PRJEB28731  | SAMEA5368193 | 2013 | Denmark | Screening | vanA | A1 | Human |
| E0274 | PRJEB28731  | SAMEA5368210 | 2014 | Denmark | Infection | vanA | A1 | Human |
| E0275 | PRJEB14634  | SAMEA4052464 | 2014 | Denmark | Screening | vanA | A1 | Human |
| E0276 | PRJEB28731  | SAMEA5368212 | 2014 | Denmark | Screening | vanA | A1 | Human |
| E0277 | PRJEB28731  | SAMEA5368221 | 2014 | Denmark | Infection | vanA | A1 | Human |
| E0278 | PRJEB28731  | SAMEA5368225 | 2014 | Denmark | Screening | vanA | A1 | Human |
| E0279 | PRJEB28731  | SAMEA4937742 | 2014 | Denmark | Screening | vanA | A2 | Human |
| E0280 | PRJEB28731  | SAMEA5368253 | 2014 | Denmark | Screening | vanA | A1 | Human |
| E0281 | PRJEB14639  | SAMEA4052469 | 2013 | Denmark | Infection | vanA | A1 | Human |
| E0282 | PRJEB28731  | SAMEA5368269 | 2014 | Denmark | Screening | vanA | A1 | Human |
| E0283 | PRJEB14631  | SAMEA4052461 | 2014 | Denmark | Screening | vanA | A1 | Human |
| E0284 | PRJEB28731  | SAMEA5368289 | 2014 | Denmark | Screening | vanA | A1 | Human |
| E0285 | PRJEB28731  | SAMEA5368296 | 2014 | Denmark | Infection | vanA | A1 | Human |
| E0286 | PRJEB28731  | SAMEA5368310 | 2014 | Denmark | Screening | vanA | A1 | Human |
| E0287 | PRJEB28731  | SAMEA5368318 | 2014 | Denmark | Infection | vanA | A1 | Human |
| E0288 | PRJEB14629  | SAMEA4052459 | 2014 | Denmark | Infection | vanA | A1 | Human |
| E0289 | PRJEB28731  | SAMEA5368352 | 2015 | Denmark | Screening | vanA | A1 | Human |
| E0290 | PRJEB28731  | SAMEA5368355 | 2013 | Denmark | Screening | vanA | A1 | Human |
| E0291 | PRJEB28731  | SAMEA5368386 | 2013 | Denmark | Infection | vanA | A1 | Human |
| E0292 | PRJEB28731  | SAMEA5368388 | 2014 | Denmark | Infection | vanA | A1 | Human |
| E0293 | PRJEB28731  | SAMEA5368420 | 2015 | Denmark | Screening | vanA | A1 | Human |

|       |             |              |      |         |           |      |    |       |
|-------|-------------|--------------|------|---------|-----------|------|----|-------|
| E0294 | PRJEB28731  | SAMEA5368487 | 2014 | Denmark | Infection | vanA | A1 | Human |
| E0295 | PRJEB28731  | SAMEA5368529 | 2015 | Denmark | Screening | vanA | A1 | Human |
| E0296 | PRJEB28731  | SAMEA5368543 | 2015 | Denmark | Screening | vanA | A1 | Human |
| E0297 | PRJEB28731  | SAMEA5368570 | 2015 | Denmark | Screening | vanA | A1 | Human |
| E0298 | PRJEB14633  | SAMEA4052463 | 2013 | Denmark | Screening | vanA | A1 | Human |
| E0299 | PRJEB28731  | SAMEA5368631 | 2015 | Denmark | Screening | vanA | A1 | Human |
| E0300 | PRJNA636894 | SAMN15088130 | 2013 | Denmark | Infection | None | B  | Human |
| E0301 | PRJEB28731  | SAMEA5368636 | 2013 | Denmark | Infection | None | B  | Human |
| E0302 | PRJEB28731  | SAMEA5368654 | 2013 | Denmark | Infection | None | A1 | Human |
| E0303 | PRJNA636894 | SAMN15088131 | 2013 | Denmark | Infection | None | A1 | Human |
| E0304 | PRJEB28731  | SAMEA5368657 | 2013 | Denmark | Infection | None | A1 | Human |
| E0305 | PRJEB28731  | SAMEA5368664 | 2013 | Denmark | Infection | None | A1 | Human |
| E0306 | PRJEB28731  | SAMEA5368668 | 2013 | Denmark | Infection | None | A2 | Human |
| E0307 | PRJEB28731  | SAMEA5368670 | 2013 | Denmark | Infection | None | A1 | Human |
| E0308 | PRJNA636894 | SAMN15088132 | 2014 | Denmark | Infection | None | A2 | Human |
| E0309 | PRJEB28731  | SAMEA5368685 | 2013 | Denmark | Infection | None | A1 | Human |
| E0310 | PRJNA636894 | SAMN15088133 | 2013 | Denmark | Infection | None | A2 | Human |
| E0311 | PRJNA636894 | SAMN15088134 | 2014 | Denmark | Infection | None | A2 | Human |
| E0312 | PRJNA636894 | SAMN15088135 | 2013 | Denmark | Infection | None | A1 | Human |
| E0313 | PRJNA636894 | SAMN15088136 | 2013 | Denmark | Infection | None | A2 | Human |
| E0314 | PRJEB28731  | SAMEA5368708 | 2015 | Denmark | Infection | None | A1 | Human |
| E0315 | PRJEB28731  | SAMEA5368710 | 2015 | Denmark | Infection | None | B  | Human |
| E0316 | PRJEB28731  | SAMEA5368713 | 2015 | Denmark | Infection | None | A1 | Human |
| E0317 | PRJEB28731  | SAMEA5368717 | 2015 | Denmark | Infection | None | A1 | Human |
| E0318 | PRJEB28731  | SAMEA5368718 | 2015 | Denmark | Infection | None | A2 | Human |
| E0319 | PRJEB28731  | SAMEA5368735 | 2015 | Denmark | Infection | None | A1 | Human |
| E0320 | PRJEB28731  | SAMEA5368738 | 2015 | Denmark | Infection | None | A1 | Human |

|       |             |              |      |         |           |      |    |       |
|-------|-------------|--------------|------|---------|-----------|------|----|-------|
| E0321 | PRJEB28731  | SAMEA5368742 | 2014 | Denmark | Infection | None | A1 | Human |
| E0322 | PRJNA636894 | SAMN15088137 | 2013 | Denmark | Infection | None | B  | Human |
| E0323 | PRJNA636894 | SAMN15088138 | 2013 | Denmark | Infection | None | B  | Human |
| E0324 | PRJNA636894 | SAMN15088139 | 2013 | Denmark | Infection | None | A2 | Human |
| E0325 | PRJNA636894 | SAMN15088140 | 2013 | Denmark | Infection | None | A2 | Human |
| E0326 | PRJEB28731  | SAMEA5368760 | 2013 | Denmark | Infection | None | A2 | Human |
| E0327 | PRJNA636894 | SAMN15088141 | 2013 | Denmark | Infection | None | A1 | Human |
| E0328 | PRJNA636894 | SAMN15088142 | 2013 | Denmark | Infection | None | A2 | Human |
| E0329 | PRJNA636894 | SAMN15088143 | 2015 | Denmark | Infection | vanA | A1 | Human |
| E0330 | PRJNA636894 | SAMN15088144 | 2015 | Denmark | Infection | vanA | A1 | Human |
| E0331 | PRJEB38219  | SAMEA6819264 | 2015 | Denmark | Infection | vanA | A1 | Human |
| E0332 | PRJNA636894 | SAMN15088145 | 2015 | Denmark | Infection | vanA | A1 | Human |
| E0333 | PRJNA636894 | SAMN15088146 | 2015 | Denmark | Infection | vanA | A1 | Human |
| E0334 | PRJEB38219  | SAMEA6819544 | 2015 | Denmark | Infection | vanA | A1 | Human |
| E0335 | PRJEB38219  | SAMEA6819454 | 2015 | Denmark | Infection | vanA | A1 | Human |
| E0336 | PRJEB38219  | SAMEA6819337 | 2015 | Denmark | Infection | vanA | A1 | Human |
| E0337 | PRJNA636894 | SAMN15088147 | 2015 | Denmark | Infection | vanA | A1 | Human |
| E0338 | PRJEB38219  | SAMEA6819260 | 2015 | Denmark | Infection | vanA | A1 | Human |
| E0339 | PRJEB38219  | SAMEA6819340 | 2015 | Denmark | Infection | vanA | A1 | Human |
| E0340 | PRJEB38219  | SAMEA6819398 | 2015 | Denmark | Infection | vanA | A1 | Human |
| E0341 | PRJNA636894 | SAMN15088148 | 2015 | Denmark | Infection | vanA | A1 | Human |
| E0342 | PRJNA636894 | SAMN15088149 | 2015 | Denmark | Infection | vanB | A1 | Human |
| E0343 | PRJEB38219  | SAMEA6819435 | 2015 | Denmark | Infection | vanA | A2 | Human |
| E0344 | PRJEB38219  | SAMEA6819356 | 2015 | Denmark | Infection | vanA | A1 | Human |
| E0345 | PRJNA636894 | SAMN15088150 | 2015 | Denmark | Infection | vanA | A1 | Human |
| E0346 | PRJEB38219  | SAMEA6819408 | 2015 | Denmark | Infection | vanA | A1 | Human |
| E0347 | PRJNA636894 | SAMN15088151 | 2015 | Denmark | Infection | vanA | A1 | Human |



|       |             |              |      |         |           |      |    |       |
|-------|-------------|--------------|------|---------|-----------|------|----|-------|
| E0348 | PRJEB38219  | SAMEA6819348 | 2015 | Denmark | Infection | vanA | A1 | Human |
| E0349 | PRJEB38219  | SAMEA6819527 | 2015 | Denmark | Infection | vanA | A1 | Human |
| E0350 | PRJEB38219  | SAMEA6819333 | 2015 | Denmark | Infection | vanA | A1 | Human |
| E0351 | PRJEB38219  | SAMEA6819461 | 2015 | Denmark | Infection | vanA | A1 | Human |
| E0352 | PRJNA636894 | SAMN15088152 | 2015 | Denmark | Infection | vanA | A1 | Human |
| E0353 | PRJEB38219  | SAMEA6819416 | 2015 | Denmark | Infection | vanA | A1 | Human |
| E0354 | PRJNA636894 | SAMN15088153 | 2015 | Denmark | Infection | vanA | A1 | Human |
| E0355 | PRJEB38219  | SAMEA6819534 | 2015 | Denmark | Infection | vanA | A1 | Human |
| E0356 | PRJNA636894 | SAMN15088154 | 2015 | Denmark | Infection | vanA | A1 | Human |
| E0357 | PRJEB38219  | SAMEA6819368 | 2015 | Denmark | Infection | vanA | A1 | Human |
| E0358 | PRJNA636894 | SAMN15088155 | 2015 | Denmark | Infection | vanA | A1 | Human |
| E0359 | PRJEB38219  | SAMEA6819411 | 2015 | Denmark | Infection | vanA | A1 | Human |
| E0360 | PRJEB38219  | SAMEA6819563 | 2015 | Denmark | Infection | vanA | A1 | Human |
| E0361 | PRJEB38219  | SAMEA6819509 | 2015 | Denmark | Infection | vanA | A1 | Human |
| E0362 | PRJEB38219  | SAMEA6819501 | 2015 | Denmark | Infection | vanA | A1 | Human |
| E0363 | PRJNA636894 | SAMN15088156 | 2012 | Norway  | Infection | None | A1 | Human |
| E0364 | PRJNA39325  | SAMN07326774 | 2012 | India   | Screening | None | A2 | Human |
| E0365 | PRJNA636894 | SAMN15088157 | 2014 | Norway  | Infection | None | A1 | Human |
| E0366 | PRJNA636894 | SAMN15088158 | 2012 | Norway  | Infection | None | A1 | Human |
| E0367 | PRJNA636894 | SAMN15088159 | 2015 | Norway  | Infection | None | A1 | Human |
| E0368 | PRJNA636894 | SAMN15088160 | 2014 | Norway  | Infection | None | A1 | Human |
| E0369 | PRJNA636894 | SAMN15088161 | 2015 | India   | Screening | None | A2 | Human |
| E0370 | PRJNA486083 | SAMN09836111 | 2015 | Norway  | Infection | None | A1 | Human |
| E0371 | PRJNA486083 | SAMN09836113 | 2015 | Norway  | Infection | None | A1 | Human |
| E0372 | PRJNA636894 | SAMN15088162 | 2015 | Norway  | Infection | None | A1 | Human |
| E0373 | PRJNA636894 | SAMN15088163 | 2015 | Norway  | Infection | None | A1 | Human |
| E0374 | PRJNA636894 | SAMN15088164 | 2015 | Norway  | Infection | None | A1 | Human |

|       |             |              |      |        |           |      |    |       |
|-------|-------------|--------------|------|--------|-----------|------|----|-------|
| E0375 | PRJNA636894 | SAMN15088165 | 2015 | Norway | Infection | None | A1 | Human |
| E0376 | PRJNA636894 | SAMN15088166 | 2015 | Norway | Screening | None | A1 | Human |
| E0377 | PRJNA306646 | SAMN04358604 | 2013 | Norway | Infection | None | A1 | Human |
| E0378 | PRJNA306646 | SAMN04358603 | 2013 | Norway | Infection | None | A1 | Human |
| E0379 | PRJNA306646 | SAMN04358606 | 2014 | Norway | Infection | None | A1 | Human |
| E0380 | PRJNA306646 | SAMN04358605 | 2014 | Norway | Infection | None | A1 | Human |
| E0381 | PRJNA306646 | SAMN04358607 | 2014 | Norway | Screening | None | A1 | Human |
| E0382 | PRJNA306646 | SAMN04358608 | 2014 | Norway | Screening | None | A1 | Human |
| E0383 | PRJNA551094 | SAMN12138986 | 2014 | Sweden | Screening | None | A1 | Human |
| E0384 | PRJEB4345   | SAMEA2156170 | 2012 | UK     | Infection | None | A1 | Human |
| E0385 | PRJEB4345   | SAMEA2151512 | 2007 | UK     | Infection | None | A1 | Human |
| E0386 | PRJEB4345   | SAMEA2160738 | 2010 | UK     | Infection | None | A1 | Human |
| E0387 | PRJEB4345   | SAMEA2155053 | 2007 | UK     | Infection | vanA | A1 | Human |
| E0388 | PRJEB4345   | SAMEA2144371 | 2007 | UK     | Infection | vanA | A1 | Human |
| E0389 | PRJEB4345   | SAMEA2144485 | 2007 | UK     | Infection | None | A1 | Human |
| E0390 | PRJEB4345   | SAMEA2144849 | 2009 | UK     | Infection | vanA | A1 | Human |
| E0391 | PRJEB4345   | SAMEA2148075 | 2009 | UK     | Infection | None | A1 | Human |
| E0392 | PRJEB4345   | SAMEA2152857 | 2007 | UK     | Infection | vanA | A1 | Human |
| E0393 | PRJEB4345   | SAMEA2153652 | 2010 | UK     | Infection | vanA | A1 | Human |
| E0394 | PRJEB4345   | SAMEA2160445 | 2007 | UK     | Infection | vanA | A1 | Human |
| E0395 | PRJEB4345   | SAMEA2145396 | 2012 | UK     | Infection | vanA | A1 | Human |
| E0396 | PRJEB4345   | SAMEA2150716 | 2008 | UK     | Infection | vanA | A1 | Human |
| E0397 | PRJEB4345   | SAMEA2161968 | 2009 | UK     | Infection | None | A1 | Human |
| E0398 | PRJEB4345   | SAMEA2149661 | 2010 | UK     | Infection | vanA | A1 | Human |
| E0399 | PRJEB4345   | SAMEA2154328 | 2007 | UK     | Infection | vanA | A1 | Human |
| E0400 | PRJEB4345   | SAMEA2147944 | 2012 | UK     | Infection | None | A1 | Human |
| E0401 | PRJEB4345   | SAMEA2162849 | 2006 | UK     | Infection | vanA | A1 | Human |

|       |           |              |      |    |           |      |    |       |
|-------|-----------|--------------|------|----|-----------|------|----|-------|
| E0402 | PRJEB4345 | SAMEA2146127 | 2010 | UK | Infection | None | A1 | Human |
| E0403 | PRJEB4345 | SAMEA2158947 | 2012 | UK | Infection | None | A1 | Human |
| E0404 | PRJEB4345 | SAMEA2152475 | 2008 | UK | Infection | None | A1 | Human |
| E0405 | PRJEB4345 | SAMEA2155160 | 2008 | UK | Infection | vanA | A1 | Human |
| E0406 | PRJEB4345 | SAMEA2154026 | 2008 | UK | Infection | None | A1 | Human |
| E0407 | PRJEB4345 | SAMEA2148195 | 2012 | UK | Infection | None | A1 | Human |
| E0408 | PRJEB4345 | SAMEA2150825 | 2008 | UK | Infection | None | A1 | Human |
| E0409 | PRJEB4345 | SAMEA2158563 | 2010 | UK | Infection | None | A1 | Human |
| E0410 | PRJEB4345 | SAMEA2146589 | 2008 | UK | Infection | vanA | A1 | Human |
| E0411 | PRJEB4345 | SAMEA2147386 | 2009 | UK | Infection | vanA | A1 | Human |
| E0412 | PRJEB4345 | SAMEA2143510 | 2009 | UK | Infection | vanA | A1 | Human |
| E0413 | PRJEB4345 | SAMEA2145560 | 2006 | UK | Infection | None | A1 | Human |
| E0414 | PRJEB4345 | SAMEA1967440 | 2009 | UK | Infection | None | A1 | Human |
| E0415 | PRJEB4345 | SAMEA2148477 | 2010 | UK | Infection | None | A1 | Human |
| E0416 | PRJEB4345 | SAMEA2155069 | 2012 | UK | Infection | vanA | A1 | Human |
| E0417 | PRJEB4345 | SAMEA2160746 | 2009 | UK | Infection | vanA | A1 | Human |
| E0418 | PRJEB4345 | SAMEA2149301 | 2010 | UK | Infection | vanA | A1 | Human |
| E0419 | PRJEB4345 | SAMEA2160311 | 2012 | UK | Infection | vanB | A1 | Human |
| E0420 | PRJEB4345 | SAMEA2155593 | 2009 | UK | Infection | vanA | A1 | Human |
| E0421 | PRJEB4345 | SAMEA2145781 | 2009 | UK | Infection | None | A1 | Human |
| E0422 | PRJEB4345 | SAMEA2162288 | 2007 | UK | Infection | vanA | A1 | Human |
| E0423 | PRJEB4345 | SAMEA2148590 | 2012 | UK | Infection | vanA | A1 | Human |
| E0424 | PRJEB4345 | SAMEA1969798 | 2010 | UK | Infection | None | A1 | Human |
| E0425 | PRJEB4345 | SAMEA2145390 | 2011 | UK | Infection | None | A1 | Human |
| E0426 | PRJEB4345 | SAMEA2163506 | 2009 | UK | Infection | vanA | A1 | Human |
| E0427 | PRJEB4345 | SAMEA2147347 | 2007 | UK | Infection | vanA | A1 | Human |
| E0428 | PRJEB4345 | SAMEA2162516 | 2011 | UK | Infection | vanA | A1 | Human |

|       |           |              |      |    |           |      |    |       |
|-------|-----------|--------------|------|----|-----------|------|----|-------|
| E0429 | PRJEB4345 | SAMEA2163343 | 2011 | UK | Infection | None | A1 | Human |
| E0430 | PRJEB4345 | SAMEA2148769 | 2010 | UK | Infection | None | A1 | Human |
| E0431 | PRJEB4345 | SAMEA2151254 | 2006 | UK | Infection | vanA | A1 | Human |
| E0432 | PRJEB4345 | SAMEA2156302 | 2011 | UK | Infection | vanA | A1 | Human |
| E0433 | PRJEB4345 | SAMEA2158364 | 2010 | UK | Infection | vanA | A1 | Human |
| E0434 | PRJEB4345 | SAMEA2148623 | 2006 | UK | Infection | vanA | A1 | Human |
| E0435 | PRJEB4345 | SAMEA2155441 | 2010 | UK | Infection | vanA | A1 | Human |
| E0436 | PRJEB4345 | SAMEA2148636 | 2009 | UK | Infection | vanA | A1 | Human |
| E0437 | PRJEB4345 | SAMEA2145117 | 2009 | UK | Infection | None | A1 | Human |
| E0438 | PRJEB4345 | SAMEA2153486 | 2008 | UK | Infection | vanA | A1 | Human |
| E0439 | PRJEB4345 | SAMEA2146844 | 2010 | UK | Infection | None | A1 | Human |
| E0440 | PRJEB4345 | SAMEA2142474 | 2009 | UK | Infection | vanA | A1 | Human |
| E0441 | PRJEB4345 | SAMEA1972111 | 2007 | UK | Infection | vanA | A1 | Human |
| E0442 | PRJEB4345 | SAMEA2154532 | 2012 | UK | Infection | vanA | A1 | Human |
| E0443 | PRJEB4345 | SAMEA2153388 | 2008 | UK | Infection | vanA | A1 | Human |
| E0444 | PRJEB4345 | SAMEA2153215 | 2008 | UK | Infection | None | A1 | Human |
| E0445 | PRJEB4345 | SAMEA2143765 | 2006 | UK | Infection | None | A1 | Human |
| E0446 | PRJEB4345 | SAMEA2157371 | 2009 | UK | Infection | vanA | A1 | Human |
| E0447 | PRJEB4345 | SAMEA2154769 | 2007 | UK | Infection | vanB | A1 | Human |
| E0448 | PRJEB4345 | SAMEA2154569 | 2011 | UK | Infection | vanA | A1 | Human |
| E0449 | PRJEB4345 | SAMEA2158662 | 2007 | UK | Infection | None | A1 | Human |
| E0450 | PRJEB4345 | SAMEA2149996 | 2008 | UK | Infection | None | A1 | Human |
| E0451 | PRJEB4345 | SAMEA2157045 | 2009 | UK | Infection | None | A1 | Human |
| E0452 | PRJEB4345 | SAMEA2159966 | 2012 | UK | Infection | vanA | A1 | Human |
| E0453 | PRJEB4345 | SAMEA2143077 | 2011 | UK | Infection | None | A1 | Human |
| E0454 | PRJEB4345 | SAMEA2154297 | 2011 | UK | Infection | None | A1 | Human |
| E0455 | PRJEB4345 | SAMEA2155476 | 2008 | UK | Infection | None | A1 | Human |

|       |           |              |      |    |           |      |    |       |
|-------|-----------|--------------|------|----|-----------|------|----|-------|
| E0456 | PRJEB4345 | SAMEA2149130 | 2007 | UK | Infection | None | A1 | Human |
| E0457 | PRJEB4345 | SAMEA2147574 | 2009 | UK | Infection | vanA | A1 | Human |
| E0458 | PRJEB4345 | SAMEA2150484 | 2012 | UK | Infection | vanB | A1 | Human |
| E0459 | PRJEB4345 | SAMEA2151753 | 2012 | UK | Infection | None | A1 | Human |
| E0460 | PRJEB4345 | SAMEA2144936 | 2012 | UK | Infection | None | A1 | Human |
| E0461 | PRJEB4345 | SAMEA2152523 | 2011 | UK | Infection | vanA | A1 | Human |
| E0462 | PRJEB4345 | SAMEA2152856 | 2011 | UK | Infection | None | A1 | Human |
| E0463 | PRJEB4345 | SAMEA2148286 | 2012 | UK | Infection | None | A1 | Human |
| E0464 | PRJEB4345 | SAMEA2155647 | 2010 | UK | Infection | vanA | A1 | Human |
| E0465 | PRJEB4345 | SAMEA2146613 | 2011 | UK | Infection | vanA | A1 | Human |
| E0466 | PRJEB4345 | SAMEA2154647 | 2008 | UK | Infection | vanA | A1 | Human |
| E0467 | PRJEB4345 | SAMEA2145669 | 2012 | UK | Infection | None | A1 | Human |
| E0468 | PRJEB4345 | SAMEA2152547 | 2007 | UK | Infection | vanA | A1 | Human |
| E0469 | PRJEB4345 | SAMEA2147837 | 2007 | UK | Infection | vanA | A1 | Human |
| E0470 | PRJEB4345 | SAMEA2156326 | 2008 | UK | Infection | None | A1 | Human |
| E0471 | PRJEB4345 | SAMEA2163546 | 2012 | UK | Infection | None | A1 | Human |
| E0472 | PRJEB4345 | SAMEA2146884 | 2010 | UK | Infection | vanA | A1 | Human |
| E0473 | PRJEB4345 | SAMEA2159244 | 2011 | UK | Infection | None | A1 | Human |
| E0474 | PRJEB4345 | SAMEA2149979 | 2010 | UK | Infection | None | A1 | Human |
| E0475 | PRJEB4345 | SAMEA2146967 | 2011 | UK | Infection | vanA | A1 | Human |
| E0476 | PRJEB4345 | SAMEA2154441 | 2012 | UK | Infection | None | A1 | Human |
| E0477 | PRJEB4345 | SAMEA1969240 | 2007 | UK | Infection | None | A1 | Human |
| E0478 | PRJEB4345 | SAMEA2142832 | 2009 | UK | Infection | vanA | A1 | Human |
| E0479 | PRJEB4345 | SAMEA2146840 | 2008 | UK | Infection | vanA | A1 | Human |
| E0480 | PRJEB4345 | SAMEA2151772 | 2009 | UK | Infection | vanA | A1 | Human |
| E0481 | PRJEB4345 | SAMEA2150875 | 2011 | UK | Infection | vanA | A1 | Human |
| E0482 | PRJEB4345 | SAMEA2161933 | 2010 | UK | Infection | vanA | A1 | Human |

|       |            |              |      |             |           |      |    |       |
|-------|------------|--------------|------|-------------|-----------|------|----|-------|
| E0483 | PRJEB4345  | SAMEA2157054 | 2011 | UK          | Infection | vanA | A1 | Human |
| E0484 | PRJNA88329 | SAMN00808981 | 1999 | Netherlands | Screening | None | A2 | Human |
| E0485 | PRJNA88321 | SAMN00808976 | 1995 | Netherlands | Screening | None | A1 | Human |
| E0486 | PRJNA88349 | SAMN00808992 | 1994 | USA         | Screening | None | A2 | Human |
| E0487 | PRJNA88805 | SAMN00809130 | 1996 | USA         | Screening | None | A1 | Human |
| E0488 | PRJNA89009 | SAMN00809200 | 1996 | USA         | Screening | None | A1 | Human |
| E0489 | PRJNA88345 | SAMN00809201 | 1993 | USA         | Unknown   | None | A1 | Human |
| E0490 | PRJNA88349 | SAMN00808989 | 1994 | USA         | Unknown   | None | A1 | Human |
| E0491 | PRJNA88355 | SAMN00808995 | 1996 | France      | Unknown   | None | A1 | Human |
| E0492 | PRJNA88357 | SAMN00808996 | 1996 | Switzerland | Unknown   | None | A1 | Human |
| E0493 | PRJNA88381 | SAMN00809009 | 1996 | Switzerland | Unknown   | None | A1 | Human |
| E0494 | PRJNA88385 | SAMN00809011 | 2010 | Denmark     | Screening | None | A1 | Human |
| E0495 | PRJNA88379 | SAMN00809008 | 1996 | USA         | Unknown   | None | A1 | Human |
| E0496 | PRJNA88821 | SAMN00809100 | 1996 | France      | Unknown   | None | A1 | Human |
| E0497 | PRJNA88829 | SAMN00809104 | 1992 | Belgium     | Infection | None | A1 | Human |
| E0498 | PRJNA73043 | SAMN00779827 | 2013 | Tanzania    | Infection | None | A1 | Human |
| E0499 | PRJNA88375 | SAMN00809006 | 2011 | Denmark     | Screening | None | A1 | Human |
| E0500 | PRJNA88801 | SAMN00809108 | 1996 | USA         | Unknown   | None | A1 | Human |
| E0501 | PRJNA88827 | SAMN00809103 | 2000 | France      | Unknown   | None | A1 | Human |
| E0502 | PRJNA88359 | SAMN00808997 | 1996 | USA         | Unknown   | None | A1 | Human |
| E0503 | PRJNA88475 | SAMN00808918 | 1996 | USA         | Unknown   | None | A1 | Human |
| E0504 | PRJNA88317 | SAMN00808974 | 1995 | Denmark     | Screening | None | A1 | Human |
| E0505 | PRJNA88319 | SAMN00808975 | 1995 | Denmark     | Screening | None | A1 | Human |
| E0506 | PRJNA88897 | SAMN00809142 | 1986 | France      | Screening | None | A1 | Human |
| E0507 | PRJNA88437 | SAMN00808917 | 1994 | France      | Unknown   | None | A1 | Human |
| E0508 | PRJNA88351 | SAMN00808993 | 1993 | USA         | Unknown   | None | A1 | Human |
| E0509 | PRJNA88353 | SAMN00808994 | 1993 | USA         | Unknown   | None | A1 | Human |

|       |            |              |         |             |           |      |    |       |
|-------|------------|--------------|---------|-------------|-----------|------|----|-------|
| E0510 | PRJNA88817 | SAMN00809098 | 1996    | France      | Unknown   | None | A1 | Human |
| E0511 | PRJNA88819 | SAMN00809099 | 1996    | France      | Unknown   | None | A1 | Human |
| E0512 | PRJNA73043 | SAMN00779806 | 2000    | UK          | Infection | None | A1 | Human |
| E0513 | PRJNA88383 | SAMN00809010 | 1996    | Switzerland | Unknown   | None | A1 | Human |
| E0514 | PRJNA73043 | SAMN00779846 | 1999    | Italy       | Infection | None | A1 | Human |
| E0515 | PRJNA73043 | SAMN00779847 | 2002    | Germany     | Screening | None | A1 | Human |
| E0516 | PRJNA73043 | SAMN00779848 | 2006    | Netherlands | Infection | None | A1 | Human |
| E0517 | PRJNA73043 | SAMN00779849 | 2002    | Netherlands | Infection | None | A1 | Human |
| E0518 | PRJNA73043 | SAMN00779851 | 2010    | Latvia      | Screening | None | A1 | Human |
| E0519 | PRJNA73043 | SAMN00779852 | 2010    | Portugal    | Screening | None | A1 | Human |
| E0520 | PRJNA88325 | SAMN00808978 | 1994    | France      | Unknown   | None | A1 | Human |
| E0521 | PRJNA73043 | SAMN00779844 | 1997    | Israel      | Infection | None | A1 | Human |
| E0522 | PRJNA88339 | SAMN00808986 | 1994    | France      | Unknown   | None | A1 | Human |
| E0523 | PRJNA88815 | SAMN00809146 | 1996    | Switzerland | Unknown   | None | A1 | Human |
| E0524 | PRJNA73043 | SAMN00779802 | 2001    | USA         | Screening | None | A1 | Human |
| E0525 | PRJNA73043 | SAMN00779835 | 2001    | USA         | Infection | None | A1 | Human |
| E0526 | PRJNA88323 | SAMN00808977 | 1994    | France      | Unknown   | None | A1 | Human |
| E0527 | PRJNA88259 | SAMN00808943 | 1995    | Denmark     | Screening | None | A1 | Human |
| E0528 | PRJNA88277 | SAMN00808953 | 2003    | Denmark     | Screening | None | A1 | Human |
| E0529 | PRJNA88373 | SAMN00809005 | 2010    | Denmark     | Infection | None | A1 | Human |
| E0530 | PRJNA88377 | SAMN00809007 | 2010    | Denmark     | Infection | None | A1 | Human |
| E0531 | PRJNA89015 | SAMN00809203 | Unknown | USA         | Screening | None | A1 | Human |
| E0532 | PRJNA89017 | SAMN00809204 | Unknown | USA         | Infection | None | A1 | Human |
| E0533 | PRJNA89019 | SAMN00809205 | Unknown | USA         | Screening | None | A1 | Human |
| E0534 | PRJNA89021 | SAMN00809206 | Unknown | USA         | Infection | None | A1 | Human |
| E0535 | PRJNA89023 | SAMN00809207 | Unknown | USA         | Screening | None | A1 | Human |
| E0536 | PRJNA89025 | SAMN00809208 | Unknown | USA         | Infection | None | A1 | Human |

|       |             |              |         |             |           |      |    |       |
|-------|-------------|--------------|---------|-------------|-----------|------|----|-------|
| E0537 | PRJNA89027  | SAMN00809209 | Unknown | USA         | Screening | None | A1 | Human |
| E0538 | PRJNA73043  | SAMN00779856 | Unknown | USA         | Screening | None | A1 | Human |
| E0539 | PRJNA73043  | SAMN00779857 | Unknown | USA         | Infection | None | A1 | Human |
| E0540 | PRJNA73043  | SAMN00779858 | Unknown | USA         | Infection | None | A1 | Human |
| E0541 | PRJNA193299 | SAMN02604219 | 2009    | Australia   | Infection | None | A1 | Human |
| E0542 | PRJNA636894 | SAMN15088167 | 1995    | Netherlands | Infection | vanA | A2 | Human |
| E0543 | PRJEB28495  | SAMEA4885994 | 1997    | France      | Screening | vanA | A2 | Human |
| E0544 | PRJNA636894 | SAMN15088168 | 1997    | Israel      | Infection | vanA | A1 | Human |
| E0545 | PRJEB28495  | SAMEA4884527 | 1997    | France      | Infection | None | A1 | Human |
| E0546 | PRJNA636894 | SAMN15088169 | Unknown | Italy       | Infection | None | A1 | Human |
| E0547 | PRJEB28495  | SAMEA4885997 | Unknown | Poland      | Infection | None | A2 | Human |
| E0548 | PRJEB28495  | SAMEA4885998 | Unknown | Austria     | Infection | None | A1 | Human |
| E0549 | PRJNA636894 | SAMN15088170 | 1998    | France      | Infection | None | A2 | Human |
| E0550 | PRJEB28495  | SAMEA4886000 | Unknown | Spain       | Infection | None | A1 | Human |
| E0551 | PRJEB28495  | SAMEA4886001 | Unknown | Switzerland | Infection | None | A2 | Human |
| E0552 | PRJEB28495  | SAMEA4886005 | Unknown | Poland      | Infection | None | A1 | Human |
| E0553 | PRJEB28495  | SAMEA4884528 | 1999    | Italy       | Infection | None | A1 | Human |
| E0554 | PRJNA636894 | SAMN15088171 | 2002    | Netherlands | Screening | vanA | A2 | Human |
| E0555 | PRJNA636894 | SAMN15088172 | 1957    | Netherlands | Infection | None | A2 | Human |
| E0556 | PRJEB28495  | SAMEA4886012 | 1998    | Brazil      | Screening | vanA | A2 | Human |
| E0557 | PRJEB28495  | SAMEA4886015 | 2001    | Tanzania    | Infection | None | A2 | Human |
| E0558 | PRJNA636894 | SAMN15088173 | 2001    | Tanzania    | Infection | None | A1 | Human |
| E0559 | PRJEB28495  | SAMEA4886016 | 2000    | Australia   | Unknown   | vanB | A1 | Human |
| E0560 | PRJNA636894 | SAMN15088174 | 2001    | Netherlands | Infection | None | A2 | Human |
| E0561 | PRJEB28495  | SAMEA4886018 | 2004    | Singapore   | Infection | vanB | A1 | Human |
| E0562 | PRJNA636894 | SAMN15088175 | 2005    | Hungary     | Infection | vanA | A1 | Human |
| E0563 | PRJNA636894 | SAMN15088176 | 2002    | Netherlands | Infection | None | A2 | Human |



|       |             |              |      |            |           |      |    |       |
|-------|-------------|--------------|------|------------|-----------|------|----|-------|
| E0564 | PRJEB28495  | SAMEA4884761 | 2010 | Latvia     | Screening | None | A1 | Human |
| E0565 | PRJEB28495  | SAMEA4884765 | 2010 | Latvia     | Screening | None | A1 | Human |
| E0566 | PRJEB28495  | SAMEA4884767 | 2010 | Latvia     | Infection | None | A1 | Human |
| E0567 | PRJEB28495  | SAMEA4884805 | 2010 | Portugal   | Screening | None | A1 | Human |
| E0568 | PRJNA636894 | SAMN15088177 | 2010 | Italy      | Screening | None | B  | Human |
| E0569 | PRJEB28495  | SAMEA4884845 | 2010 | Portugal   | Screening | None | A1 | Human |
| E0570 | PRJEB28495  | SAMEA4884854 | 2010 | Latvia     | Screening | None | A1 | Human |
| E0571 | PRJEB28495  | SAMEA4884883 | 2010 | Latvia     | Screening | None | A2 | Human |
| E0572 | PRJEB28495  | SAMEA4884887 | 2010 | Latvia     | Screening | None | A1 | Human |
| E0573 | PRJEB28495  | SAMEA4884890 | 2009 | France     | Unknown   | None | A1 | Human |
| E0574 | PRJEB28495  | SAMEA4884893 | 2010 | Slovenia   | Unknown   | None | A1 | Human |
| E0575 | PRJEB28495  | SAMEA4884895 | 2009 | France     | Unknown   | None | A1 | Human |
| E0576 | PRJEB28495  | SAMEA4884931 | 2010 | Portugal   | Unknown   | None | A1 | Human |
| E0577 | PRJEB28495  | SAMEA4884936 | 2010 | Italy      | Unknown   | None | A2 | Human |
| E0578 | PRJEB28495  | SAMEA4884976 | 2008 | Slovenia   | Unknown   | None | A1 | Human |
| E0579 | PRJEB28495  | SAMEA4884977 | 2008 | Slovenia   | Unknown   | None | A1 | Human |
| E0580 | PRJEB28495  | SAMEA4885018 | 2009 | Slovenia   | Screening | None | A1 | Human |
| E0581 | PRJEB28495  | SAMEA4885032 | 2010 | Portugal   | Screening | None | A1 | Human |
| E0582 | PRJEB28495  | SAMEA4885042 | 2009 | Luxembourg | Screening | None | A1 | Human |
| E0583 | PRJEB28495  | SAMEA4885045 | 2009 | Greece     | Screening | None | A1 | Human |
| E0584 | PRJEB28495  | SAMEA4885046 | 2009 | Greece     | Infection | None | A1 | Human |
| E0585 | PRJEB28495  | SAMEA4885067 | 2010 | Greece     | Screening | None | A2 | Human |
| E0586 | PRJEB28495  | SAMEA4885071 | 2010 | Greece     | Screening | None | A1 | Human |
| E0587 | PRJEB28495  | SAMEA4885076 | 2010 | Greece     | Screening | None | A1 | Human |
| E0588 | PRJEB28495  | SAMEA4885095 | 2009 | Greece     | Screening | None | A1 | Human |
| E0589 | PRJEB28495  | SAMEA4885098 | 2008 | Greece     | Screening | None | A1 | Human |
| E0590 | PRJEB28495  | SAMEA4885102 | 2009 | Greece     | Screening | vanA | A1 | Human |

|       |             |              |         |             |           |      |    |       |
|-------|-------------|--------------|---------|-------------|-----------|------|----|-------|
| E0591 | PRJEB28495  | SAMEA4885103 | 2009    | Greece      | Screening | None | A2 | Human |
| E0592 | PRJEB28495  | SAMEA4885113 | 2012    | Netherlands | Unknown   | vanA | A1 | Human |
| E0593 | PRJEB28495  | SAMEA4885117 | 2012    | Netherlands | Unknown   | vanA | A1 | Human |
| E0594 | PRJEB28495  | SAMEA4885119 | 2012    | Netherlands | Unknown   | vanB | A1 | Human |
| E0595 | PRJEB28495  | SAMEA4885181 | Unknown | Netherlands | Unknown   | vanA | A2 | Human |
| E0596 | PRJEB28495  | SAMEA4885195 | 2012    | Netherlands | Screening | vanA | A1 | Human |
| E0597 | PRJEB28495  | SAMEA4885198 | 2012    | Netherlands | Unknown   | vanA | A1 | Human |
| E0598 | PRJEB28495  | SAMEA4885207 | 2009    | Netherlands | Infection | vanB | A1 | Human |
| E0599 | PRJEB28495  | SAMEA4885211 | 2010    | Netherlands | Infection | vanB | A1 | Human |
| E0600 | PRJEB28495  | SAMEA4885217 | 2011    | Netherlands | Screening | vanA | A1 | Human |
| E0601 | PRJEB28495  | SAMEA4885232 | 2012    | Netherlands | Unknown   | vanA | A1 | Human |
| E0602 | PRJEB28495  | SAMEA4885313 | 2012    | Netherlands | Unknown   | vanA | A2 | Human |
| E0603 | PRJEB28495  | SAMEA4885317 | 2012    | Netherlands | Unknown   | vanA | A1 | Human |
| E0604 | PRJEB28495  | SAMEA4885321 | 2012    | Netherlands | Infection | vanB | A1 | Human |
| E0605 | PRJEB28495  | SAMEA4885326 | 2012    | Netherlands | Unknown   | vanA | A1 | Human |
| E0606 | PRJEB28495  | SAMEA4885331 | 2013    | Netherlands | Infection | vanB | A1 | Human |
| E0607 | PRJEB28495  | SAMEA4885333 | 2013    | Netherlands | Screening | vanA | A2 | Human |
| E0608 | PRJEB28495  | SAMEA4885339 | 2013    | Netherlands | Screening | vanA | A1 | Human |
| E0609 | PRJEB28495  | SAMEA4885369 | 2013    | Netherlands | Screening | vanA | A1 | Human |
| E0610 | PRJEB28495  | SAMEA4885382 | 2013    | Netherlands | Screening | vanA | A2 | Human |
| E0611 | PRJEB28495  | SAMEA4885407 | 2013    | Netherlands | Unknown   | vanB | A1 | Human |
| E0612 | PRJNA636894 | SAMN15088178 | 2013    | Netherlands | Unknown   | vanA | B  | Human |
| E0613 | PRJEB28495  | SAMEA4885413 | 2012    | Netherlands | Unknown   | vanB | A2 | Human |
| E0614 | PRJEB28495  | SAMEA4885422 | 2013    | Netherlands | Unknown   | vanA | A1 | Human |
| E0615 | PRJEB28495  | SAMEA4885462 | 2013    | Netherlands | Unknown   | vanB | A1 | Human |
| E0616 | PRJEB28495  | SAMEA4885475 | 2013    | Netherlands | Unknown   | vanB | A1 | Human |
| E0617 | PRJEB28495  | SAMEA4885490 | 2013    | Netherlands | Screening | vanB | A1 | Human |

|       |            |              |      |             |           |      |    |       |
|-------|------------|--------------|------|-------------|-----------|------|----|-------|
| E0618 | PRJEB28495 | SAMEA4885498 | 2013 | Netherlands | Unknown   | vanA | A1 | Human |
| E0619 | PRJEB28495 | SAMEA4885500 | 2013 | Netherlands | Screening | vanA | A1 | Human |
| E0620 | PRJEB28495 | SAMEA4885536 | 2014 | Netherlands | Unknown   | vanB | A1 | Human |
| E0621 | PRJEB28495 | SAMEA4885543 | 2014 | Netherlands | Unknown   | vanB | A1 | Human |
| E0622 | PRJEB28495 | SAMEA4885561 | 2014 | Netherlands | Screening | vanA | A1 | Human |
| E0623 | PRJEB28495 | SAMEA4885607 | 2014 | Netherlands | Screening | vanA | A2 | Human |
| E0624 | PRJEB28495 | SAMEA4885648 | 2005 | Netherlands | Unknown   | vanA | A1 | Human |
| E0625 | PRJEB28495 | SAMEA4885669 | 2015 | Netherlands | Unknown   | vanB | A1 | Human |
| E0626 | PRJEB28495 | SAMEA4885731 | 2015 | Netherlands | Unknown   | vanA | A1 | Human |
| E0627 | PRJEB28495 | SAMEA4885734 | 2015 | Netherlands | Unknown   | vanA | A1 | Human |
| E0628 | PRJEB28495 | SAMEA4885736 | 2015 | Netherlands | Unknown   | vanA | A1 | Human |
| E0629 | PRJEB28495 | SAMEA4885768 | 2015 | Netherlands | Unknown   | vanA | A1 | Human |
| E0630 | PRJEB28495 | SAMEA4885776 | 2015 | Netherlands | Unknown   | vanA | A1 | Human |
| E0631 | PRJEB28495 | SAMEA4885781 | 2015 | Netherlands | Unknown   | vanA | A1 | Human |
| E0632 | PRJEB28495 | SAMEA4885786 | 2015 | Netherlands | Unknown   | vanB | A1 | Human |
| E0633 | PRJEB28495 | SAMEA4885796 | 2015 | Netherlands | Unknown   | vanB | A1 | Human |
| E0634 | PRJEB28495 | SAMEA4885831 | 2015 | Netherlands | Screening | vanC | A1 | Human |
| E0635 | PRJEB28495 | SAMEA4885940 | 2015 | Netherlands | Screening | vanA | A1 | Human |
| E0636 | PRJEB8624  | SAMEA3388987 | 2003 | Australia   | Infection | None | A1 | Human |
| E0637 | PRJEB8624  | SAMEA3388988 | 2012 | Australia   | Infection | None | A1 | Human |
| E0638 | PRJEB8624  | SAMEA3388989 | 2004 | Australia   | Infection | None | A1 | Human |
| E0639 | PRJEB8624  | SAMEA3388990 | 2012 | Australia   | Infection | vanB | A1 | Human |
| E0640 | PRJEB8624  | SAMEA3388991 | 2006 | Australia   | Infection | None | A1 | Human |
| E0641 | PRJEB8624  | SAMEA3388992 | 2012 | Australia   | Infection | None | A1 | Human |
| E0642 | PRJEB8624  | SAMEA3388993 | 2007 | Australia   | Infection | vanB | A1 | Human |
| E0643 | PRJEB8624  | SAMEA3388994 | 2013 | Australia   | Infection | None | A1 | Human |
| E0644 | PRJEB8624  | SAMEA3388995 | 2011 | Australia   | Infection | vanB | A1 | Human |

|       |           |              |      |           |           |      |    |       |
|-------|-----------|--------------|------|-----------|-----------|------|----|-------|
| E0645 | PRJEB8624 | SAMEA3388996 | 2012 | Australia | Infection | None | A1 | Human |
| E0646 | PRJEB8624 | SAMEA3388997 | 2011 | Australia | Infection | vanB | A1 | Human |
| E0647 | PRJEB8624 | SAMEA3388998 | 2012 | Australia | Infection | None | A1 | Human |
| E0648 | PRJEB8624 | SAMEA3388999 | 2011 | Australia | Infection | None | A1 | Human |
| E0649 | PRJEB8624 | SAMEA3389000 | 2013 | Australia | Infection | None | A2 | Human |
| E0650 | PRJEB8624 | SAMEA3389001 | 2012 | Australia | Infection | None | A1 | Human |
| E0651 | PRJEB8624 | SAMEA3389002 | 2012 | Australia | Infection | vanB | A1 | Human |
| E0652 | PRJEB8624 | SAMEA3389003 | 2004 | Australia | Infection | None | A1 | Human |
| E0653 | PRJEB8624 | SAMEA3389004 | 2012 | Australia | Infection | None | A1 | Human |
| E0654 | PRJEB8624 | SAMEA3389005 | 2012 | Australia | Infection | vanB | A1 | Human |
| E0655 | PRJEB8624 | SAMEA3389006 | 2006 | Australia | Infection | None | A1 | Human |
| E0656 | PRJEB8624 | SAMEA3389007 | 2012 | Australia | Infection | vanB | A1 | Human |
| E0657 | PRJEB8624 | SAMEA3389008 | 2007 | Australia | Infection | None | A1 | Human |
| E0658 | PRJEB8624 | SAMEA3389009 | 2013 | Australia | Infection | None | A1 | Human |
| E0659 | PRJEB8624 | SAMEA3389010 | 2011 | Australia | Infection | None | A1 | Human |
| E0660 | PRJEB8624 | SAMEA3389011 | 2012 | Australia | Infection | None | A1 | Human |
| E0661 | PRJEB8624 | SAMEA3389012 | 2011 | Australia | Infection | None | A1 | Human |
| E0662 | PRJEB8624 | SAMEA3389013 | 2013 | Australia | Infection | None | A1 | Human |
| E0663 | PRJEB8624 | SAMEA3389014 | 2011 | Australia | Infection | vanB | A1 | Human |
| E0664 | PRJEB8624 | SAMEA3389015 | 2012 | Australia | Infection | None | A1 | Human |
| E0665 | PRJEB8624 | SAMEA3389016 | 2012 | Australia | Infection | vanB | A1 | Human |
| E0666 | PRJEB8624 | SAMEA3389017 | 2012 | Australia | Infection | None | A1 | Human |
| E0667 | PRJEB8624 | SAMEA3389018 | 2005 | Australia | Infection | None | A1 | Human |
| E0668 | PRJEB8624 | SAMEA3389019 | 2012 | Australia | Infection | None | A1 | Human |
| E0669 | PRJEB8624 | SAMEA3389020 | 2006 | Australia | Infection | None | A1 | Human |
| E0670 | PRJEB8624 | SAMEA3389021 | 2012 | Australia | Infection | None | A1 | Human |
| E0671 | PRJEB8624 | SAMEA3389022 | 2013 | Australia | Infection | None | A1 | Human |

|       |           |              |      |           |           |      |    |       |
|-------|-----------|--------------|------|-----------|-----------|------|----|-------|
| E0672 | PRJEB8624 | SAMEA3389023 | 2011 | Australia | Infection | None | A1 | Human |
| E0673 | PRJEB8624 | SAMEA3389024 | 2013 | Australia | Infection | None | A1 | Human |
| E0674 | PRJEB8624 | SAMEA3389025 | 2011 | Australia | Infection | vanB | A1 | Human |
| E0675 | PRJEB8624 | SAMEA3389026 | 2012 | Australia | Infection | None | A1 | Human |
| E0676 | PRJEB8624 | SAMEA3389027 | 2011 | Australia | Infection | None | A1 | Human |
| E0677 | PRJEB8624 | SAMEA3389028 | 2012 | Australia | Infection | vanB | A1 | Human |
| E0678 | PRJEB8624 | SAMEA3389029 | 2012 | Australia | Infection | vanB | A1 | Human |
| E0679 | PRJEB8624 | SAMEA3389030 | 2004 | Australia | Infection | None | A1 | Human |
| E0680 | PRJEB8624 | SAMEA3389031 | 2012 | Australia | Infection | None | A1 | Human |
| E0681 | PRJEB8624 | SAMEA3389032 | 2007 | Australia | Infection | None | A1 | Human |
| E0682 | PRJEB8624 | SAMEA3389033 | 2012 | Australia | Infection | None | A1 | Human |
| E0683 | PRJEB8624 | SAMEA3389034 | 2006 | Australia | Infection | vanB | A1 | Human |
| E0684 | PRJEB8624 | SAMEA3389035 | 2012 | Australia | Infection | None | A1 | Human |
| E0685 | PRJEB8624 | SAMEA3389036 | 2007 | Australia | Infection | None | A1 | Human |
| E0686 | PRJEB8624 | SAMEA3389037 | 2013 | Australia | Infection | None | A1 | Human |
| E0687 | PRJEB8624 | SAMEA3389038 | 2011 | Australia | Infection | vanB | A1 | Human |
| E0688 | PRJEB8624 | SAMEA3389039 | 2013 | Australia | Infection | None | A1 | Human |
| E0689 | PRJEB8624 | SAMEA3389040 | 2011 | Australia | Infection | vanB | A1 | Human |
| E0690 | PRJEB8624 | SAMEA3389041 | 2012 | Australia | Infection | vanB | A1 | Human |
| E0691 | PRJEB8624 | SAMEA3389042 | 2011 | Australia | Infection | None | A1 | Human |
| E0692 | PRJEB8624 | SAMEA3389043 | 2012 | Australia | Infection | vanB | A1 | Human |
| E0693 | PRJEB8624 | SAMEA3389044 | 2012 | Australia | Infection | vanB | A1 | Human |
| E0694 | PRJEB8624 | SAMEA3389045 | 2012 | Australia | Infection | vanB | A1 | Human |
| E0695 | PRJEB8624 | SAMEA3389046 | 2004 | Australia | Infection | vanB | A1 | Human |
| E0696 | PRJEB8624 | SAMEA3389047 | 2011 | Australia | Infection | None | A1 | Human |
| E0697 | PRJEB8624 | SAMEA3389048 | 2005 | Australia | Infection | vanB | A1 | Human |
| E0698 | PRJEB8624 | SAMEA3389049 | 2006 | Australia | Infection | None | A1 | Human |

|       |           |              |      |           |           |      |    |       |
|-------|-----------|--------------|------|-----------|-----------|------|----|-------|
| E0699 | PRJEB8624 | SAMEA3389050 | 2012 | Australia | Infection | vanB | A1 | Human |
| E0700 | PRJEB8624 | SAMEA3389051 | 2007 | Australia | Infection | None | A1 | Human |
| E0701 | PRJEB8624 | SAMEA3389052 | 2013 | Australia | Infection | None | A1 | Human |
| E0702 | PRJEB8624 | SAMEA3389053 | 2011 | Australia | Infection | None | A1 | Human |
| E0703 | PRJEB8624 | SAMEA3389054 | 2013 | Australia | Infection | vanB | A1 | Human |
| E0704 | PRJEB8624 | SAMEA3389055 | 2011 | Australia | Infection | None | A1 | Human |
| E0705 | PRJEB8624 | SAMEA3389056 | 2012 | Australia | Infection | None | A1 | Human |
| E0706 | PRJEB8624 | SAMEA3389057 | 2011 | Australia | Infection | vanB | A1 | Human |
| E0707 | PRJEB8624 | SAMEA3389058 | 2012 | Australia | Infection | None | A1 | Human |
| E0708 | PRJEB8624 | SAMEA3389059 | 2012 | Australia | Infection | vanB | A1 | Human |
| E0709 | PRJEB8624 | SAMEA3389060 | 2012 | Australia | Infection | None | A1 | Human |
| E0710 | PRJEB8624 | SAMEA3389061 | 2004 | Australia | Infection | None | A2 | Human |
| E0711 | PRJEB8624 | SAMEA3389062 | 2013 | Australia | Infection | None | A1 | Human |
| E0712 | PRJEB8624 | SAMEA3389063 | 2005 | Australia | Infection | vanB | A1 | Human |
| E0713 | PRJEB8624 | SAMEA3389064 | 2012 | Australia | Infection | None | A1 | Human |
| E0714 | PRJEB8624 | SAMEA3389065 | 2007 | Australia | Infection | vanB | A1 | Human |
| E0715 | PRJEB8624 | SAMEA3389066 | 2012 | Australia | Infection | vanB | A1 | Human |
| E0716 | PRJEB8624 | SAMEA3389067 | 2005 | Australia | Infection | vanB | A1 | Human |
| E0717 | PRJEB8624 | SAMEA3389068 | 2013 | Australia | Infection | None | A1 | Human |
| E0718 | PRJEB8624 | SAMEA3389069 | 2011 | Australia | Infection | None | A1 | Human |
| E0719 | PRJEB8624 | SAMEA3389070 | 2011 | Australia | Infection | None | A1 | Human |
| E0720 | PRJEB8624 | SAMEA3389071 | 2011 | Australia | Infection | vanB | A1 | Human |
| E0721 | PRJEB8624 | SAMEA3389072 | 2012 | Australia | Infection | None | A1 | Human |
| E0722 | PRJEB8624 | SAMEA3389073 | 2004 | Australia | Infection | None | A1 | Human |
| E0723 | PRJEB8624 | SAMEA3389074 | 2005 | Australia | Infection | vanB | A1 | Human |
| E0724 | PRJEB8624 | SAMEA3389075 | 2007 | Australia | Infection | vanB | A1 | Human |
| E0725 | PRJEB8624 | SAMEA3389076 | 2007 | Australia | Infection | vanB | A1 | Human |

|       |           |              |      |           |           |      |    |       |
|-------|-----------|--------------|------|-----------|-----------|------|----|-------|
| E0726 | PRJEB8624 | SAMEA3389077 | 2011 | Australia | Infection | None | A1 | Human |
| E0727 | PRJEB8624 | SAMEA3389078 | 2011 | Australia | Infection | vanB | A1 | Human |
| E0728 | PRJEB8624 | SAMEA3389079 | 2011 | Australia | Infection | None | A1 | Human |
| E0729 | PRJEB8624 | SAMEA3389080 | 2012 | Australia | Infection | None | A1 | Human |
| E0730 | PRJEB8624 | SAMEA3389081 | 2004 | Australia | Infection | None | A1 | Human |
| E0731 | PRJEB8624 | SAMEA3389082 | 2005 | Australia | Infection | None | A1 | Human |
| E0732 | PRJEB8624 | SAMEA3389083 | 2007 | Australia | Infection | vanB | A1 | Human |
| E0733 | PRJEB8624 | SAMEA3389084 | 2007 | Australia | Infection | None | A1 | Human |
| E0734 | PRJEB8624 | SAMEA3389085 | 2011 | Australia | Infection | vanB | A1 | Human |
| E0735 | PRJEB8624 | SAMEA3389086 | 2011 | Australia | Infection | vanB | A1 | Human |
| E0736 | PRJEB8624 | SAMEA3389087 | 2011 | Australia | Infection | None | A1 | Human |
| E0737 | PRJEB8624 | SAMEA3389088 | 2012 | Australia | Infection | None | A1 | Human |
| E0738 | PRJEB8624 | SAMEA3389089 | 2004 | Australia | Infection | None | A1 | Human |
| E0739 | PRJEB8624 | SAMEA3389090 | 2006 | Australia | Infection | None | A1 | Human |
| E0740 | PRJEB8624 | SAMEA3389091 | 2007 | Australia | Infection | vanB | A1 | Human |
| E0741 | PRJEB8624 | SAMEA3389092 | 2007 | Australia | Infection | None | A2 | Human |
| E0742 | PRJEB8624 | SAMEA3389093 | 2011 | Australia | Infection | vanB | A1 | Human |
| E0743 | PRJEB8624 | SAMEA3389094 | 2011 | Australia | Infection | None | A1 | Human |
| E0744 | PRJEB8624 | SAMEA3389095 | 2012 | Australia | Infection | None | A1 | Human |
| E0745 | PRJEB8624 | SAMEA3389096 | 2012 | Australia | Infection | vanB | A1 | Human |
| E0746 | PRJEB8624 | SAMEA3389097 | 2006 | Australia | Infection | None | A1 | Human |
| E0747 | PRJEB8624 | SAMEA3389098 | 2007 | Australia | Infection | vanB | A1 | Human |
| E0748 | PRJEB8624 | SAMEA3389099 | 2011 | Australia | Infection | None | A1 | Human |
| E0749 | PRJEB8624 | SAMEA3389100 | 2011 | Australia | Infection | vanB | A1 | Human |
| E0750 | PRJEB8624 | SAMEA3389101 | 2011 | Australia | Infection | None | A1 | Human |
| E0751 | PRJEB8624 | SAMEA3389102 | 2011 | Australia | Infection | vanB | A1 | Human |
| E0752 | PRJEB8624 | SAMEA3389103 | 2012 | Australia | Infection | None | A1 | Human |

|       |             |              |      |           |           |      |    |       |
|-------|-------------|--------------|------|-----------|-----------|------|----|-------|
| E0753 | PRJEB8624   | SAMEA3389104 | 2004 | Australia | Infection | None | A1 | Human |
| E0754 | PRJEB8624   | SAMEA3389105 | 2006 | Australia | Infection | None | A1 | Human |
| E0755 | PRJEB8624   | SAMEA3389106 | 2007 | Australia | Infection | None | A1 | Human |
| E0756 | PRJEB8624   | SAMEA3389107 | 2011 | Australia | Infection | None | A1 | Human |
| E0757 | PRJEB8624   | SAMEA3389108 | 2011 | Australia | Infection | vanB | A1 | Human |
| E0758 | PRJEB8624   | SAMEA3389109 | 2011 | Australia | Infection | None | A1 | Human |
| E0759 | PRJEB8624   | SAMEA3389110 | 2012 | Australia | Infection | vanB | A1 | Human |
| E0760 | PRJEB8624   | SAMEA3389111 | 2012 | Australia | Infection | None | A1 | Human |
| E0761 | PRJEB8624   | SAMEA3389112 | 2006 | Australia | Infection | None | A1 | Human |
| E0762 | PRJEB8624   | SAMEA3389113 | 2007 | Australia | Infection | vanB | A1 | Human |
| E0763 | PRJEB8624   | SAMEA3389114 | 2011 | Australia | Infection | vanB | A1 | Human |
| E0764 | PRJEB8624   | SAMEA3389115 | 2011 | Australia | Infection | vanB | A1 | Human |
| E0765 | PRJEB8624   | SAMEA3389116 | 2011 | Australia | Infection | None | A1 | Human |
| E0766 | PRJEB8624   | SAMEA3389117 | 2012 | Australia | Infection | vanB | A1 | Human |
| E0767 | PRJEB8624   | SAMEA3389118 | 2012 | Australia | Infection | None | A1 | Human |
| E0768 | PRJNA636894 | SAMN15088179 | 2000 | Brazil    | Screening | None | B  | Human |
| E0769 | PRJNA636894 | SAMN15088180 | 2000 | Brazil    | Screening | None | A2 | Human |
| E0770 | PRJNA636894 | SAMN15088181 | 2001 | Brazil    | Screening | None | A2 | Human |
| E0771 | PRJNA636894 | SAMN15088182 | 2001 | Brazil    | Screening | None | A2 | Human |
| E0772 | PRJNA636894 | SAMN15088183 | 1997 | Brazil    | Infection | vanA | A2 | Human |
| E0773 | PRJNA636894 | SAMN15088184 | 1998 | Brazil    | Screening | vanA | A1 | Human |
| E0774 | PRJNA636894 | SAMN15088185 | 2001 | Tanzania  | Infection | None | A1 | Human |
| E0775 | PRJNA636894 | SAMN15088186 | 2001 | Tanzania  | Infection | None | A2 | Human |
| E0776 | PRJNA636894 | SAMN15088187 | 2001 | Tanzania  | Infection | None | A1 | Human |
| E0777 | PRJNA636894 | SAMN15088188 | 2001 | Tanzania  | Infection | None | A1 | Human |
| E0778 | PRJNA636894 | SAMN15088189 | 2001 | Tanzania  | Infection | None | A1 | Human |
| E0779 | PRJNA636894 | SAMN15088190 | 2001 | Tanzania  | Infection | None | B  | Human |



|       |             |              |      |           |           |      |    |       |
|-------|-------------|--------------|------|-----------|-----------|------|----|-------|
| E0780 | PRJNA342552 | SAMN05831040 | 2000 | Australia | Infection | vanA | A1 | Human |
| E0781 | PRJNA342552 | SAMN05831041 | 2001 | Australia | Infection | None | B  | Human |
| E0782 | PRJNA342552 | SAMN05831042 | 2005 | Australia | Infection | None | A1 | Human |
| E0783 | PRJNA342552 | SAMN05831043 | 2005 | Australia | Infection | None | B  | Human |
| E0784 | PRJNA342552 | SAMN05831044 | 2006 | Australia | Infection | None | A1 | Human |
| E0785 | PRJNA342552 | SAMN05831046 | 2011 | Australia | Infection | None | A1 | Human |
| E0786 | PRJNA342552 | SAMN05831047 | 2011 | Australia | Infection | None | B  | Human |
| E0787 | PRJNA342552 | SAMN05831048 | 2011 | Australia | Infection | vanB | A1 | Human |
| E0788 | PRJNA342552 | SAMN05831049 | 2011 | Australia | Infection | None | A1 | Human |
| E0789 | PRJNA342552 | SAMN05831050 | 2011 | Australia | Infection | None | A1 | Human |
| E0790 | PRJNA342552 | SAMN05831051 | 2011 | Australia | Infection | vanB | A1 | Human |
| E0791 | PRJNA342552 | SAMN05831052 | 2011 | Australia | Infection | None | A1 | Human |
| E0792 | PRJNA342552 | SAMN05831053 | 2011 | Australia | Infection | None | A2 | Human |
| E0793 | PRJNA342552 | SAMN05831054 | 2011 | Australia | Infection | None | A1 | Human |
| E0794 | PRJNA342552 | SAMN05831055 | 2011 | Australia | Infection | None | A1 | Human |
| E0795 | PRJNA342552 | SAMN05831056 | 2011 | Australia | Infection | vanB | A1 | Human |
| E0796 | PRJNA342552 | SAMN05831057 | 2011 | Australia | Infection | None | A2 | Human |
| E0797 | PRJNA342552 | SAMN05831058 | 2011 | Australia | Infection | vanB | A1 | Human |
| E0798 | PRJNA342552 | SAMN05831059 | 2011 | Australia | Infection | vanB | A1 | Human |
| E0799 | PRJNA342552 | SAMN05831060 | 2012 | Australia | Infection | vanB | A1 | Human |
| E0800 | PRJNA342552 | SAMN05831061 | 2012 | Australia | Infection | None | A1 | Human |
| E0801 | PRJNA342552 | SAMN05831062 | 2012 | Australia | Infection | vanB | A1 | Human |
| E0802 | PRJNA342552 | SAMN05831063 | 2012 | Australia | Infection | None | B  | Human |
| E0803 | PRJNA342552 | SAMN05831064 | 2012 | Australia | Infection | vanB | A1 | Human |
| E0804 | PRJNA342552 | SAMN05831065 | 2012 | Australia | Infection | None | A2 | Human |
| E0805 | PRJNA342552 | SAMN05831066 | 2012 | Australia | Infection | None | A1 | Human |
| E0806 | PRJNA342552 | SAMN05831067 | 2012 | Australia | Infection | None | A1 | Human |

|       |             |              |      |           |           |      |    |       |
|-------|-------------|--------------|------|-----------|-----------|------|----|-------|
| E0807 | PRJNA342552 | SAMN05831068 | 2012 | Australia | Infection | vanB | A1 | Human |
| E0808 | PRJNA342552 | SAMN05831069 | 2012 | Australia | Infection | None | A1 | Human |
| E0809 | PRJNA342552 | SAMN05831070 | 2012 | Australia | Infection | vanB | A1 | Human |
| E0810 | PRJNA342552 | SAMN05831071 | 2012 | Australia | Infection | vanB | A1 | Human |
| E0811 | PRJNA342552 | SAMN05831072 | 2013 | Australia | Infection | None | A1 | Human |
| E0812 | PRJNA342552 | SAMN05831073 | 2013 | Australia | Infection | None | A1 | Human |
| E0813 | PRJNA342552 | SAMN05831074 | 2013 | Australia | Infection | None | A1 | Human |
| E0814 | PRJNA342552 | SAMN05831075 | 2013 | Australia | Infection | None | A1 | Human |
| E0815 | PRJNA342552 | SAMN05831076 | 2013 | Australia | Infection | vanB | A1 | Human |
| E0816 | PRJNA342552 | SAMN05831077 | 2013 | Australia | Infection | None | A2 | Human |
| E0817 | PRJNA342552 | SAMN05831078 | 2013 | Australia | Infection | None | A1 | Human |
| E0818 | PRJNA342552 | SAMN05831079 | 2013 | Australia | Infection | None | A2 | Human |
| E0819 | PRJNA342552 | SAMN05831080 | 2013 | Australia | Infection | None | B  | Human |
| E0820 | PRJNA342552 | SAMN05831081 | 2013 | Australia | Infection | vanB | A1 | Human |
| E0821 | PRJNA342552 | SAMN05831082 | 2014 | Australia | Infection | vanB | A1 | Human |
| E0822 | PRJNA342552 | SAMN05831083 | 2014 | Australia | Infection | None | A1 | Human |
| E0823 | PRJNA342552 | SAMN05831084 | 2014 | Australia | Infection | None | A1 | Human |
| E0824 | PRJNA342552 | SAMN05831086 | 2014 | Australia | Infection | None | A1 | Human |
| E0825 | PRJNA342552 | SAMN05831087 | 2014 | Australia | Infection | vanB | A1 | Human |
| E0826 | PRJNA342552 | SAMN05831088 | 2014 | Australia | Infection | None | A1 | Human |
| E0827 | PRJNA342552 | SAMN05831089 | 2015 | Australia | Infection | None | A1 | Human |
| E0828 | PRJNA342552 | SAMN05831090 | 2015 | Australia | Infection | vanB | A1 | Human |
| E0829 | PRJNA342552 | SAMN05831091 | 2015 | Australia | Infection | vanA | A1 | Human |
| E0830 | PRJNA342552 | SAMN05831092 | 2015 | Australia | Infection | vanB | A1 | Human |
| E0831 | PRJNA310320 | SAMN04450365 | 2004 | Germany   | Infection | vanB | A1 | Human |
| E0832 | PRJNA310320 | SAMN04450367 | 2004 | Germany   | Infection | vanA | A1 | Human |
| E0833 | PRJNA310320 | SAMN04450369 | 2005 | Germany   | Infection | vanB | A1 | Human |

|       |             |              |      |         |           |      |    |       |
|-------|-------------|--------------|------|---------|-----------|------|----|-------|
| E0834 | PRJNA310320 | SAMN04450372 | 2006 | Germany | Infection | None | A1 | Human |
| E0835 | PRJNA310320 | SAMN04450374 | 2007 | Germany | Infection | None | A1 | Human |
| E0836 | PRJNA310320 | SAMN04450375 | 2007 | Germany | Infection | None | A1 | Human |
| E0837 | PRJNA310320 | SAMN04450377 | 2007 | Germany | Infection | None | A1 | Human |
| E0838 | PRJNA310320 | SAMN04450378 | 2007 | Germany | Infection | None | A1 | Human |
| E0839 | PRJNA310320 | SAMN04450380 | 2008 | Germany | Infection | None | A1 | Human |
| E0840 | PRJNA310320 | SAMN04450381 | 2008 | Germany | Screening | vanB | A1 | Human |
| E0841 | PRJNA310320 | SAMN04450382 | 2008 | Germany | Screening | vanB | A1 | Human |
| E0842 | PRJNA310320 | SAMN04450383 | 2009 | Germany | Infection | vanB | A1 | Human |
| E0843 | PRJNA310320 | SAMN04450384 | 2009 | Germany | Infection | vanB | A1 | Human |
| E0844 | PRJNA310320 | SAMN04450385 | 2009 | Germany | Screening | vanB | A1 | Human |
| E0845 | PRJNA310320 | SAMN04450387 | 2009 | Germany | Infection | vanB | A1 | Human |
| E0846 | PRJNA310320 | SAMN04450388 | 2009 | Germany | Infection | vanB | A1 | Human |
| E0847 | PRJNA310320 | SAMN04450389 | 2009 | Germany | Infection | None | A1 | Human |
| E0848 | PRJNA310320 | SAMN04450390 | 2009 | Germany | Infection | vanB | A1 | Human |
| E0849 | PRJNA310320 | SAMN04450391 | 2010 | Germany | Infection | vanB | A1 | Human |
| E0850 | PRJNA310320 | SAMN04450392 | 2010 | Germany | Infection | None | A1 | Human |
| E0851 | PRJNA310320 | SAMN04450393 | 2010 | Germany | Infection | vanB | A1 | Human |
| E0852 | PRJNA310320 | SAMN04450394 | 2010 | Germany | Infection | vanB | A1 | Human |
| E0853 | PRJNA310320 | SAMN04450395 | 2010 | Germany | Infection | vanB | A1 | Human |
| E0854 | PRJNA310320 | SAMN04450396 | 2010 | Germany | Infection | vanB | A1 | Human |
| E0855 | PRJNA310320 | SAMN04450397 | 2011 | Germany | Infection | None | A1 | Human |
| E0856 | PRJNA310320 | SAMN04450398 | 2011 | Germany | Infection | vanB | A1 | Human |
| E0857 | PRJNA310320 | SAMN04450401 | 2011 | Germany | Screening | vanB | A1 | Human |
| E0858 | PRJNA310320 | SAMN04450404 | 2011 | Germany | Infection | vanB | A1 | Human |
| E0859 | PRJNA310320 | SAMN04450405 | 2011 | Germany | Infection | vanB | A1 | Human |
| E0860 | PRJNA310320 | SAMN04450406 | 2011 | Germany | Infection | vanB | A1 | Human |

|       |             |              |      |         |           |      |    |       |
|-------|-------------|--------------|------|---------|-----------|------|----|-------|
| E0861 | PRJNA310320 | SAMN04450359 | 2013 | Germany | Infection | vanB | A1 | Human |
| E0862 | PRJNA310320 | SAMN04450360 | 2013 | Germany | Infection | vanB | A1 | Human |
| E0863 | PRJNA310320 | SAMN04450361 | 2013 | Germany | Infection | vanB | A1 | Human |
| E0864 | PRJNA310320 | SAMN04450362 | 2014 | Germany | Infection | vanB | A1 | Human |
| E0865 | PRJNA310320 | SAMN04450363 | 2014 | Germany | Infection | vanA | A1 | Human |
| E0866 | PRJNA310320 | SAMN04450364 | 2004 | Germany | Infection | vanB | A1 | Human |
| E0867 | PRJNA310320 | SAMN04450373 | 2007 | Germany | Infection | vanB | A1 | Human |
| E0868 | PRJNA310320 | SAMN04450379 | 2007 | Germany | Infection | vanB | A1 | Human |
| E0869 | PRJNA310320 | SAMN04450376 | 2007 | Germany | Infection | vanB | A1 | Human |
| E0870 | PRJNA310320 | SAMN04450407 | 2012 | Germany | Infection | vanB | A1 | Human |
| E0871 | PRJNA310320 | SAMN04450368 | 2005 | Germany | Infection | vanB | A1 | Human |
| E0872 | PRJNA310320 | SAMN04450408 | 2012 | Germany | Infection | vanB | A1 | Human |
| E0873 | PRJNA310320 | SAMN04450366 | 2004 | Germany | Infection | vanB | A1 | Human |
| E0874 | PRJNA310320 | SAMN04450400 | 2011 | Germany | Infection | vanB | A1 | Human |
| E0875 | PRJNA310320 | SAMN04450386 | 2009 | Germany | Infection | vanB | A1 | Human |
| E0876 | PRJNA310320 | SAMN04450399 | 2011 | Germany | Infection | vanB | A1 | Human |
| E0877 | PRJNA310320 | SAMN04450402 | 2011 | Germany | Infection | vanB | A1 | Human |
| E0878 | PRJNA310320 | SAMN04450403 | 2011 | Germany | Infection | vanB | A1 | Human |
| E0879 | PRJNA310320 | SAMN04450370 | 2006 | Germany | Infection | vanB | A1 | Human |
| E0880 | PRJNA328573 | SAMN05375116 | 2014 | Germany | Screening | vanA | A1 | Human |
| E0881 | PRJNA328573 | SAMN05375117 | 2014 | Germany | Infection | vanB | A1 | Human |
| E0882 | PRJNA328573 | SAMN05375118 | 2014 | Germany | Screening | vanA | A1 | Human |
| E0883 | PRJNA328573 | SAMN05375119 | 2015 | Germany | Screening | vanA | A1 | Human |
| E0884 | PRJNA636894 | SAMN15088191 | 2016 | Germany | Infection | vanA | A1 | Human |
| E0885 | PRJNA636894 | SAMN15088192 | 2016 | Germany | Infection | vanA | A1 | Human |
| E0886 | PRJNA636894 | SAMN15088193 | 2016 | Germany | Infection | vanB | A1 | Human |
| E0887 | PRJNA636894 | SAMN15088194 | 2016 | Germany | Infection | vanB | A1 | Human |

|       |             |              |      |         |           |      |    |       |
|-------|-------------|--------------|------|---------|-----------|------|----|-------|
| E0888 | PRJNA636894 | SAMN15088195 | 2016 | Germany | Infection | vanB | A1 | Human |
| E0889 | PRJNA636894 | SAMN15088196 | 2016 | Germany | Infection | vanA | A1 | Human |
| E0890 | PRJNA636894 | SAMN15088197 | 2016 | Germany | Infection | vanA | A1 | Human |
| E0891 | PRJNA636894 | SAMN15088198 | 2016 | Germany | Infection | vanB | A1 | Human |
| E0892 | PRJNA636894 | SAMN15088199 | 2016 | Germany | Infection | vanB | A1 | Human |
| E0893 | PRJNA636894 | SAMN15088200 | 2016 | Germany | Infection | vanB | A1 | Human |
| E0894 | PRJNA636894 | SAMN15088201 | 2016 | Germany | Infection | vanB | A1 | Human |
| E0895 | PRJNA636894 | SAMN15088202 | 2016 | Germany | Infection | vanA | A1 | Human |
| E0896 | PRJNA636894 | SAMN15088203 | 2016 | Germany | Infection | vanB | A1 | Human |
| E0897 | PRJNA636894 | SAMN15088204 | 2016 | Germany | Infection | vanB | A1 | Human |
| E0898 | PRJNA636894 | SAMN15088205 | 2016 | Germany | Infection | None | A2 | Human |
| E0899 | PRJNA636894 | SAMN15088206 | 2016 | Germany | Infection | vanB | A1 | Human |
| E0900 | PRJNA636894 | SAMN15088207 | 2016 | Germany | Infection | vanB | A1 | Human |
| E0901 | PRJNA636894 | SAMN15088208 | 2016 | Germany | Infection | vanB | A1 | Human |
| E0902 | PRJNA636894 | SAMN15088209 | 2016 | Germany | Infection | vanB | A1 | Human |
| E0903 | PRJNA636894 | SAMN15088210 | 2016 | Germany | Infection | vanB | A1 | Human |
| E0904 | PRJNA636894 | SAMN15088211 | 2016 | Germany | Infection | vanB | A1 | Human |
| E0905 | PRJNA636894 | SAMN15088212 | 2016 | Germany | Infection | None | A1 | Human |
| E0906 | PRJNA636894 | SAMN15088213 | 2016 | Germany | Infection | None | A1 | Human |
| E0907 | PRJNA636894 | SAMN15088214 | 2016 | Germany | Infection | None | A1 | Human |
| E0908 | PRJNA636894 | SAMN15088215 | 2016 | Germany | Infection | vanB | A1 | Human |
| E0909 | PRJNA636894 | SAMN15088216 | 2016 | Germany | Infection | vanB | A1 | Human |
| E0910 | PRJNA636894 | SAMN15088217 | 2016 | Germany | Infection | vanA | A1 | Human |
| E0911 | PRJNA636894 | SAMN15088218 | 2016 | Germany | Infection | vanA | A1 | Human |
| E0912 | PRJNA636894 | SAMN15088219 | 2016 | Germany | Infection | vanA | A1 | Human |
| E0913 | PRJNA636894 | SAMN15088220 | 2016 | Germany | Screening | vanA | A1 | Human |
| E0914 | PRJNA636894 | SAMN15088221 | 2016 | Germany | Infection | vanA | A1 | Human |

|       |             |              |      |         |           |      |    |       |
|-------|-------------|--------------|------|---------|-----------|------|----|-------|
| E0915 | PRJNA636894 | SAMN15088222 | 2016 | Germany | Infection | vanB | A1 | Human |
| E0916 | PRJNA636894 | SAMN15088223 | 2016 | Germany | Infection | None | A1 | Human |
| E0917 | PRJNA636894 | SAMN15088224 | 2016 | Germany | Infection | vanB | A1 | Human |
| E0918 | PRJNA636894 | SAMN15088225 | 2016 | Germany | Infection | vanB | A1 | Human |
| E0919 | PRJNA636894 | SAMN15088226 | 2016 | Germany | Infection | vanA | A1 | Human |
| E0920 | PRJNA636894 | SAMN15088227 | 2016 | Germany | Infection | vanB | A1 | Human |
| E0921 | PRJNA636894 | SAMN15088228 | 2016 | Germany | Infection | vanB | A1 | Human |
| E0922 | PRJNA636894 | SAMN15088229 | 2016 | Germany | Infection | vanA | A1 | Human |
| E0923 | PRJNA636894 | SAMN15088230 | 2016 | Germany | Infection | vanB | A1 | Human |
| E0924 | PRJNA636894 | SAMN15088231 | 2016 | Germany | Infection | vanB | A1 | Human |
| E0925 | PRJNA636894 | SAMN15088232 | 2016 | Germany | Infection | vanB | A1 | Human |
| E0926 | PRJNA636894 | SAMN15088233 | 2016 | Germany | Infection | vanB | A1 | Human |
| E0927 | PRJNA636894 | SAMN15088234 | 2016 | Germany | Infection | vanB | A1 | Human |
| E0928 | PRJNA636894 | SAMN15088235 | 2016 | Germany | Screening | vanA | A1 | Human |
| E0929 | PRJNA636894 | SAMN15088236 | 2016 | Germany | Infection | vanC | A1 | Human |
| E0930 | PRJNA636894 | SAMN15088237 | 2016 | Germany | Infection | vanB | A1 | Human |
| E0931 | PRJNA636894 | SAMN15088238 | 2016 | Germany | Infection | vanA | A1 | Human |
| E0932 | PRJNA636894 | SAMN15088239 | 2016 | Germany | Infection | None | A1 | Human |
| E0933 | PRJNA636894 | SAMN15088240 | 2016 | Germany | Infection | vanB | A1 | Human |
| E0934 | PRJNA636894 | SAMN15088241 | 2016 | Germany | Infection | vanB | A1 | Human |
| E0935 | PRJNA636894 | SAMN15088242 | 2016 | Germany | Infection | vanB | A1 | Human |
| E0936 | PRJNA636894 | SAMN15088243 | 2016 | Germany | Infection | vanB | A1 | Human |
| E0937 | PRJNA636894 | SAMN15088244 | 2016 | Germany | Infection | None | A2 | Human |
| E0938 | PRJNA636894 | SAMN15088245 | 2016 | Germany | Infection | None | B  | Human |
| E0939 | PRJNA636894 | SAMN15088246 | 2016 | Germany | Infection | None | A1 | Human |
| E0940 | PRJNA636894 | SAMN15088247 | 2016 | Germany | Infection | vanB | A1 | Human |
| E0941 | PRJNA636894 | SAMN15088248 | 2016 | Germany | Infection | vanB | A1 | Human |

|       |             |              |      |         |           |      |    |       |
|-------|-------------|--------------|------|---------|-----------|------|----|-------|
| E0942 | PRJNA636894 | SAMN15088249 | 2016 | Germany | Infection | vanB | A1 | Human |
| E0943 | PRJNA636894 | SAMN15088250 | 2016 | Germany | Infection | None | A1 | Human |
| E0944 | PRJNA636894 | SAMN15088251 | 2014 | Japan   | Infection | None | A1 | Human |
| E0945 | PRJNA636894 | SAMN15088252 | 2014 | Japan   | Infection | None | B  | Human |
| E0946 | PRJNA636894 | SAMN15088253 | 2014 | Japan   | Infection | None | A2 | Human |
| E0947 | PRJNA636894 | SAMN15088254 | 2014 | Japan   | Infection | None | A1 | Human |
| E0948 | PRJNA636894 | SAMN15088255 | 2014 | Japan   | Screening | None | A1 | Human |
| E0949 | PRJNA636894 | SAMN15088256 | 2014 | Japan   | Infection | None | A1 | Human |
| E0950 | PRJNA636894 | SAMN15088257 | 2014 | Japan   | Infection | None | B  | Human |
| E0951 | PRJNA636894 | SAMN15088258 | 2014 | Japan   | Infection | None | A1 | Human |
| E0952 | PRJNA636894 | SAMN15088259 | 2014 | Japan   | Infection | None | A1 | Human |
| E0953 | PRJNA636894 | SAMN15088260 | 2014 | Japan   | Infection | None | A1 | Human |
| E0954 | PRJNA636894 | SAMN15088261 | 2014 | Japan   | Infection | None | A1 | Human |
| E0955 | PRJNA636894 | SAMN15088262 | 2014 | Japan   | Infection | None | A1 | Human |
| E0956 | PRJNA636894 | SAMN15088263 | 2014 | Japan   | Infection | None | A1 | Human |
| E0957 | PRJNA636894 | SAMN15088264 | 2014 | Japan   | Infection | None | A2 | Human |
| E0958 | PRJNA636894 | SAMN15088265 | 2014 | Japan   | Infection | None | A1 | Human |
| E0959 | PRJNA636894 | SAMN15088266 | 2014 | Japan   | Screening | None | A1 | Human |
| E0960 | PRJNA636894 | SAMN15088267 | 2014 | Japan   | Infection | None | A1 | Human |
| E0961 | PRJNA636894 | SAMN15088268 | 2014 | Japan   | Infection | None | A1 | Human |
| E0962 | PRJNA636894 | SAMN15088269 | 2014 | Japan   | Infection | None | A1 | Human |
| E0963 | PRJNA636894 | SAMN15088270 | 2014 | Japan   | Infection | None | A1 | Human |
| E0964 | PRJNA636894 | SAMN15088271 | 2014 | Japan   | Infection | None | A1 | Human |
| E0965 | PRJNA636894 | SAMN15088272 | 2014 | Japan   | Infection | None | A1 | Human |
| E0966 | PRJNA636894 | SAMN15088273 | 2014 | Japan   | Infection | None | A1 | Human |
| E0967 | PRJNA636894 | SAMN15088274 | 2014 | Japan   | Infection | None | B  | Human |
| E0968 | PRJNA636894 | SAMN15088275 | 2014 | Japan   | Infection | None | A1 | Human |

|       |             |              |      |       |           |      |    |       |
|-------|-------------|--------------|------|-------|-----------|------|----|-------|
| E0969 | PRJNA636894 | SAMN15088276 | 2014 | Japan | Infection | None | A1 | Human |
| E0970 | PRJNA636894 | SAMN15088277 | 2014 | Japan | Infection | None | A1 | Human |
| E0971 | PRJNA636894 | SAMN15088278 | 2014 | Japan | Infection | None | A1 | Human |
| E0972 | PRJNA636894 | SAMN15088279 | 2014 | Japan | Infection | None | A1 | Human |
| E0973 | PRJNA636894 | SAMN15088280 | 2014 | Japan | Infection | None | A1 | Human |
| E0974 | PRJNA636894 | SAMN15088281 | 2014 | Japan | Infection | None | A1 | Human |
| E0975 | PRJNA636894 | SAMN15088282 | 2014 | Japan | Infection | None | B  | Human |
| E0976 | PRJNA636894 | SAMN15088283 | 2014 | Japan | Infection | None | A1 | Human |
| E0977 | PRJNA636894 | SAMN15088284 | 2014 | Japan | Infection | None | A1 | Human |
| E0978 | PRJNA636894 | SAMN15088285 | 2014 | Japan | Infection | None | B  | Human |
| E0979 | PRJNA636894 | SAMN15088286 | 2014 | Japan | Infection | None | A1 | Human |
| E0980 | PRJNA636894 | SAMN15088287 | 2014 | Japan | Infection | None | A1 | Human |
| E0981 | PRJNA636894 | SAMN15088288 | 2014 | Japan | Screening | None | A1 | Human |
| E0982 | PRJNA636894 | SAMN15088289 | 2014 | Japan | Infection | None | A1 | Human |
| E0983 | PRJNA636894 | SAMN15088290 | 2014 | Japan | Infection | None | A1 | Human |
| E0984 | PRJNA636894 | SAMN15088291 | 2014 | Japan | Infection | None | A1 | Human |
| E0985 | PRJNA636894 | SAMN15088292 | 2014 | Japan | Infection | None | A1 | Human |
| E0986 | PRJNA636894 | SAMN15088293 | 2014 | Japan | Infection | None | A1 | Human |
| E0987 | PRJNA636894 | SAMN15088294 | 2014 | Japan | Infection | None | A1 | Human |
| E0988 | PRJNA636894 | SAMN15088295 | 2014 | Japan | Infection | None | A1 | Human |
| E0989 | PRJNA636894 | SAMN15088296 | 2014 | Japan | Infection | None | A1 | Human |
| E0990 | PRJNA636894 | SAMN15088297 | 2014 | Japan | Infection | None | A1 | Human |
| E0991 | PRJNA636894 | SAMN15088298 | 2014 | Japan | Infection | None | A1 | Human |
| E0992 | PRJNA636894 | SAMN15088299 | 2014 | Japan | Infection | None | A1 | Human |
| E0993 | PRJNA636894 | SAMN15088300 | 2014 | Japan | Infection | None | A1 | Human |
| E0994 | PRJNA636894 | SAMN15088301 | 2014 | Japan | Infection | None | A1 | Human |
| E0995 | PRJNA636894 | SAMN15088302 | 2014 | Japan | Screening | None | A1 | Human |



|       |             |              |      |       |           |      |    |       |
|-------|-------------|--------------|------|-------|-----------|------|----|-------|
| E0996 | PRJNA636894 | SAMN15088303 | 2014 | Japan | Infection | None | A1 | Human |
| E0997 | PRJNA636894 | SAMN15088304 | 2014 | Japan | Infection | None | A2 | Human |
| E0998 | PRJNA636894 | SAMN15088305 | 2014 | Japan | Infection | None | A1 | Human |
| E0999 | PRJNA636894 | SAMN15088306 | 2014 | Japan | Infection | None | A1 | Human |
| E1000 | PRJNA636894 | SAMN15088307 | 2014 | Japan | Infection | None | A1 | Human |
| E1001 | PRJNA636894 | SAMN15088308 | 2014 | Japan | Infection | None | A1 | Human |
| E1002 | PRJNA636894 | SAMN15088309 | 2014 | Japan | Infection | None | A1 | Human |
| E1003 | PRJNA636894 | SAMN15088310 | 2014 | Japan | Infection | None | A1 | Human |
| E1004 | PRJNA636894 | SAMN15088311 | 2014 | Japan | Infection | None | A1 | Human |
| E1005 | PRJNA636894 | SAMN15088312 | 2014 | Japan | Infection | None | B  | Human |
| E1006 | PRJNA636894 | SAMN15088313 | 2014 | Japan | Infection | None | A2 | Human |
| E1007 | PRJNA636894 | SAMN15088314 | 2014 | Japan | Infection | None | A1 | Human |
| E1008 | PRJNA636894 | SAMN15088315 | 2014 | Japan | Infection | None | A1 | Human |
| E1009 | PRJNA636894 | SAMN15088316 | 2014 | Japan | Infection | None | A1 | Human |
| E1010 | PRJNA636894 | SAMN15088317 | 2014 | Japan | Infection | None | A1 | Human |
| E1011 | PRJNA636894 | SAMN15088318 | 2014 | Japan | Infection | None | A1 | Human |
| E1012 | PRJNA636894 | SAMN15088319 | 2014 | Japan | Screening | None | A1 | Human |
| E1013 | PRJNA636894 | SAMN15088320 | 2014 | Japan | Infection | None | A1 | Human |
| E1014 | PRJNA636894 | SAMN15088321 | 2015 | Japan | Infection | None | A1 | Human |
| E1015 | PRJNA636894 | SAMN15088322 | 2015 | Japan | Infection | None | A1 | Human |
| E1016 | PRJNA636894 | SAMN15088323 | 2015 | Japan | Infection | None | B  | Human |
| E1017 | PRJNA636894 | SAMN15088324 | 2015 | Japan | Infection | None | A1 | Human |
| E1018 | PRJNA636894 | SAMN15088325 | 2015 | Japan | Infection | None | A1 | Human |
| E1019 | PRJNA636894 | SAMN15088326 | 2015 | Japan | Infection | None | B  | Human |
| E1020 | PRJNA636894 | SAMN15088327 | 2015 | Japan | Infection | None | A1 | Human |
| E1021 | PRJNA636894 | SAMN15088328 | 2015 | Japan | Infection | None | A1 | Human |
| E1022 | PRJNA636894 | SAMN15088329 | 2015 | Japan | Infection | None | A1 | Human |

|       |             |              |      |         |           |      |    |       |
|-------|-------------|--------------|------|---------|-----------|------|----|-------|
| E1023 | PRJNA636894 | SAMN15088330 | 2015 | Japan   | Screening | None | A1 | Human |
| E1024 | PRJNA636894 | SAMN15088331 | 2015 | Japan   | Infection | None | A1 | Human |
| E1025 | PRJNA636894 | SAMN15088332 | 2015 | Japan   | Infection | None | A1 | Human |
| E1026 | PRJNA636894 | SAMN15088333 | 2015 | Japan   | Infection | None | A1 | Human |
| E1027 | PRJNA636894 | SAMN15088334 | 2015 | Japan   | Screening | None | A1 | Human |
| E1028 | PRJNA636894 | SAMN15088335 | 2015 | Japan   | Infection | None | A1 | Human |
| E1029 | PRJNA636894 | SAMN15088336 | 2015 | Japan   | Infection | None | A1 | Human |
| E1030 | PRJNA636894 | SAMN15088337 | 2015 | Japan   | Infection | None | A1 | Human |
| E1031 | PRJNA636894 | SAMN15088338 | 2015 | Japan   | Infection | None | B  | Human |
| E1032 | PRJNA636894 | SAMN15088339 | 2015 | Japan   | Infection | None | A1 | Human |
| E1033 | PRJNA636894 | SAMN15088340 | 2015 | Japan   | Screening | None | A2 | Human |
| E1034 | PRJNA636894 | SAMN15088341 | 2015 | Japan   | Infection | None | A1 | Human |
| E1035 | PRJNA636894 | SAMN15088342 | 2015 | Japan   | Screening | None | A1 | Human |
| E1036 | PRJNA636894 | SAMN15088343 | 2015 | Japan   | Infection | None | A2 | Human |
| E1037 | PRJNA636894 | SAMN15088344 | 2015 | Japan   | Screening | None | A1 | Human |
| E1038 | PRJNA636894 | SAMN15088345 | 2015 | Japan   | Infection | None | A1 | Human |
| E1039 | PRJNA636894 | SAMN15088346 | 2015 | Japan   | Infection | None | A1 | Human |
| E1040 | PRJNA636894 | SAMN15088347 | 2011 | Belgium | Infection | None | A1 | Human |
| E1041 | PRJNA636894 | SAMN15088348 | 2012 | Belgium | Infection | None | A1 | Human |
| E1042 | PRJNA552025 | SAMN12640957 | 2011 | Belgium | Infection | None | A1 | Human |
| E1043 | PRJNA552025 | SAMN13164758 | 2016 | Belgium | Infection | None | A1 | Human |
| E1044 | PRJNA552025 | SAMN13164759 | 2016 | Belgium | Infection | None | A1 | Human |
| E1045 | PRJNA552025 | SAMN13157963 | 2012 | Belgium | Infection | None | A1 | Human |
| E1046 | PRJNA552025 | SAMN13195566 | 2012 | Belgium | Infection | None | A1 | Human |
| E1047 | PRJNA552025 | SAMN13155795 | 2012 | Belgium | Infection | None | A1 | Human |
| E1048 | PRJNA552025 | SAMN13159150 | 2014 | Belgium | Infection | None | A1 | Human |
| E1049 | PRJNA552025 | SAMN12640948 | 2015 | Belgium | Infection | None | A1 | Human |

|       |             |              |         |           |           |      |    |       |
|-------|-------------|--------------|---------|-----------|-----------|------|----|-------|
| E1050 | PRJNA552025 | SAMN13159147 | 2014    | Belgium   | Infection | None | A1 | Human |
| E1051 | PRJNA552025 | SAMN13159157 | 2014    | Belgium   | Infection | None | A1 | Human |
| E1052 | PRJNA552025 | SAMN13159158 | 2014    | Belgium   | Infection | None | A1 | Human |
| E1053 | PRJNA552025 | SAMN13164754 | 2015    | Belgium   | Infection | None | A1 | Human |
| E1054 | PRJNA552025 | SAMN13164752 | 2015    | Belgium   | Infection | None | A1 | Human |
| E1055 | PRJNA552025 | SAMN13195567 | 2015    | Belgium   | Infection | None | A1 | Human |
| E1056 | PRJNA552025 | SAMN13159152 | 2014    | Belgium   | Infection | None | A1 | Human |
| E1057 | PRJNA636894 | SAMN15088349 | 2014    | Belgium   | Infection | None | A1 | Human |
| E1058 | PRJNA552025 | SAMN13159160 | 2014    | Belgium   | Infection | None | A1 | Human |
| E1059 | PRJNA552025 | SAMN13159144 | 2013    | Belgium   | Infection | None | A1 | Human |
| E1060 | PRJNA552025 | SAMN13159151 | 2014    | Belgium   | Infection | None | A1 | Human |
| E1061 | PRJNA552025 | SAMN13159142 | 2013    | Belgium   | Infection | None | A1 | Human |
| E1062 | PRJNA552025 | SAMN13159159 | 2014    | Belgium   | Infection | None | A1 | Human |
| E1063 | PRJNA552025 | SAMN13164791 | 2015    | Belgium   | Infection | None | A1 | Human |
| E1064 | PRJNA552025 | SAMN13159155 | 2014    | Belgium   | Infection | None | A1 | Human |
| E1065 | PRJNA552025 | SAMN13164748 | 2015    | Belgium   | Infection | None | A1 | Human |
| E1066 | PRJNA552025 | SAMN13164751 | 2015    | Belgium   | Infection | None | A1 | Human |
| E1067 | PRJNA552025 | SAMN13164757 | 2015    | Belgium   | Infection | None | A1 | Human |
| E1068 | PRJNA552025 | SAMN13164756 | 2015    | Belgium   | Infection | None | A1 | Human |
| E1069 | PRJNA552025 | SAMN12640949 | 2015    | Belgium   | Infection | None | A1 | Human |
| E1070 | PRJNA552025 | SAMN13159148 | 2014    | Belgium   | Infection | None | A1 | Human |
| E1071 | PRJNA552025 | SAMN13159149 | 2014    | Belgium   | Infection | None | A1 | Human |
| E1072 | PRJNA552025 | SAMN13164750 | 2015    | Belgium   | Infection | None | A1 | Human |
| E1073 | PRJNA342552 | SAMN05831045 | 2011    | Australia | Infection | None | A1 | Human |
| E1074 | PRJNA342552 | SAMN05831085 | 2014    | Australia | Infection | None | A2 | Human |
| E1075 | PRJNA636894 | SAMN15088350 | Unknown | Brazil    | Screening | None | A2 | Human |
| E1076 | PRJNA552025 | SAMN12640964 | 2013    | Belgium   | Infection | vanA | A2 | Human |

|       |             |              |      |         |           |      |    |       |
|-------|-------------|--------------|------|---------|-----------|------|----|-------|
| E1077 | PRJNA552025 | SAMN12640969 | 2004 | Belgium | Infection | vanA | A1 | Human |
| E1078 | PRJNA552025 | SAMN12634763 | 2009 | Belgium | Infection | vanB | A1 | Human |
| E1079 | PRJNA552025 | SAMN13157960 | 2012 | Belgium | Infection | vanA | A1 | Human |
| E1080 | PRJNA552025 | SAMN12634766 | 2012 | Belgium | Infection | vanA | A1 | Human |
| E1081 | PRJNA552025 | SAMN13155793 | 2012 | Belgium | Infection | vanB | A1 | Human |
| E1082 | PRJNA552025 | SAMN13155791 | 2009 | Belgium | Infection | vanB | A1 | Human |
| E1083 | PRJNA552025 | SAMN13157962 | 2012 | Belgium | Infection | vanA | A1 | Human |
| E1084 | PRJNA552025 | SAMN13164767 | 2016 | Belgium | Infection | vanA | A1 | Human |
| E1085 | PRJNA552025 | SAMN13164770 | 2016 | Belgium | Infection | vanA | A1 | Human |
| E1086 | PRJNA552025 | SAMN13164772 | 2016 | Belgium | Infection | vanA | A1 | Human |
| E1087 | PRJNA552025 | SAMN12640966 | 2016 | Belgium | Infection | vanA | A1 | Human |
| E1088 | PRJNA552025 | SAMN13164773 | 2016 | Belgium | Infection | vanA | A1 | Human |
| E1089 | PRJNA552025 | SAMN13155790 | 2008 | Belgium | Infection | vanB | A1 | Human |
| E1090 | PRJNA552025 | SAMN13168598 | 2002 | Belgium | Infection | vanB | A1 | Human |
| E1091 | PRJNA552025 | SAMN12640968 | 2003 | Belgium | Infection | vanA | A1 | Human |
| E1092 | PRJNA552025 | SAMN12634760 | 2003 | Belgium | Infection | vanA | A1 | Human |
| E1093 | PRJNA552025 | SAMN12634761 | 2007 | Belgium | Infection | vanA | A1 | Human |
| E1094 | PRJNA552025 | SAMN13164786 | 2012 | Belgium | Infection | vanA | A1 | Human |
| E1095 | PRJNA552025 | SAMN12640959 | 2012 | Belgium | Infection | vanA | A1 | Human |
| E1096 | PRJNA636894 | SAMN15088351 | 2007 | Belgium | Infection | vanA | A1 | Human |
| E1097 | PRJNA552025 | SAMN13168603 | 2005 | Belgium | Infection | vanA | A1 | Human |
| E1098 | PRJNA552025 | SAMN12634762 | 2009 | Belgium | Infection | None | A1 | Human |
| E1099 | PRJNA636894 | SAMN15088352 | 2009 | Belgium | Infection | vanA | A1 | Human |
| E1100 | PRJNA552025 | SAMN13155792 | 2011 | Belgium | Infection | vanB | A1 | Human |
| E1101 | PRJNA636894 | SAMN15088353 | 2007 | Belgium | Infection | vanB | A1 | Human |
| E1102 | PRJNA552025 | SAMN13155794 | 2011 | Belgium | Infection | vanB | A1 | Human |
| E1103 | PRJNA552025 | SAMN12634767 | 2011 | Belgium | Infection | vanA | A1 | Human |

|       |             |              |      |                |           |      |    |           |
|-------|-------------|--------------|------|----------------|-----------|------|----|-----------|
| E1104 | PRJNA552025 | SAMN13157961 | 2010 | Belgium        | Infection | vanB | A1 | Human     |
| E1105 | PRJNA552025 | SAMN12634764 | 2010 | Belgium        | Infection | vanA | A1 | Human     |
| E1106 | PRJNA552025 | SAMN12640958 | 2011 | Belgium        | Infection | vanB | A1 | Human     |
| E1107 | PRJNA552025 | SAMN13155821 | 2011 | Belgium        | Infection | vanA | A1 | Human     |
| E1108 | PRJNA552025 | SAMN12560306 | 2008 | Belgium        | Infection | vanA | A1 | Human     |
| E1109 | PRJNA552025 | SAMN13195565 | 2010 | Belgium        | Infection | None | A1 | Human     |
| LB01  | PRJNA73043  | SAMN00779812 | 2001 | Ireland        | Screening | None | B  | Human     |
| LB02  | PRJNA73043  | SAMN00779819 | 2000 | Netherlands    | Infection | None | B  | Human     |
| LB03  | PRJNA73043  | SAMN00779813 | 2004 | Netherlands    | Infection | None | B  | Human     |
| LB04  | PRJNA73043  | SAMN00779801 | 2006 | Netherlands    | Infection | None | B  | Human     |
| LB05  | PRJNA73043  | SAMN00779820 | 2001 | Spain          | Screening | None | B  | Human     |
| LB06  | PRJNA73043  | SAMN00779808 | 2000 | Germany        | Infection | None | B  | Human     |
| LB07  | PRJNA73043  | SAMN00779818 | 1998 | Netherlands    | Screening | None | B  | Human     |
| LB08  | PRJNA73043  | SAMN00779803 | 1956 | Norway         | Unknown   | None | B  | Non-human |
| LB09  | PRJNA73043  | SAMN00779822 | 1964 | Norway         | Unknown   | None | B  | Non-human |
| LB10  | PRJNA73043  | SAMN00779845 | 2000 | Germany        | Unknown   | None | B  | Human     |
| LA201 | PRJNA73043  | SAMN00779800 | 2001 | South Africa   | Unknown   | None | A2 | Non-human |
| LA202 | PRJNA73043  | SAMN00779833 | 1960 | Netherlands    | Infection | None | A2 | Human     |
| LA203 | PRJNA73043  | SAMN00779834 | 2001 | Germany        | Screening | None | A2 | Non-human |
| LA204 | PRJNA73043  | SAMN00779817 | 1998 | Netherlands    | Screening | None | A2 | Human     |
| LA205 | PRJNA73043  | SAMN00779810 | 1965 | Netherlands    | Screening | None | A2 | Human     |
| LA206 | PRJNA73043  | SAMN00779829 | 1994 | Belgium        | Unknown   | None | A2 | Non-human |
| LA207 | PRJNA73043  | SAMN00779809 | 1959 | Netherlands    | Unknown   | None | A2 | Non-human |
| LA208 | PRJNA73043  | SAMN00779811 | 1998 | France         | Infection | None | A2 | Human     |
| LA209 | PRJNA73043  | SAMN00779831 | 1996 | Netherlands    | Screening | vanA | A2 | Non-human |
| LA210 | PRJNA73043  | SAMN00779804 | 2004 | Sweden         | Unknown   | vanA | A2 | Non-human |
| LA211 | PRJNA73043  | SAMN00779840 | 1992 | United Kingdom | Screening | None | A2 | Non-human |

|       |            |              |      |             |           |      |    |           |
|-------|------------|--------------|------|-------------|-----------|------|----|-----------|
| LA212 | PRJNA73043 | SAMN00779823 | 1996 | Netherlands | Screening | vanA | A2 | Non-human |
| LA213 | PRJNA73043 | SAMN00779866 | 2004 | Netherlands | Unknown   | None | A2 | Non-human |
| LA214 | PRJNA73043 | SAMN00779824 | 1957 | Netherlands | Infection | None | A2 | Human     |
| LA215 | PRJNA73043 | SAMN00779867 | 1995 | Belgium     | Unknown   | None | A2 | Non-human |
| LA216 | PRJNA73043 | SAMN00779807 | 2001 | Netherlands | Screening | None | A2 | Human     |
| LA217 | PRJNA73043 | SAMN00779855 | 1995 | Belgium     | Unknown   | vanA | A2 | Non-human |
| LA218 | PRJNA73043 | SAMN00779821 | 1995 | Netherlands | Infection | vanA | A2 | Human     |
| LA219 | PRJNA73043 | SAMN00779814 | 2001 | Denmark     | Unknown   | None | A2 | Non-human |
| LA220 | PRJNA73043 | SAMN00779839 | 1998 | Spain       | Infection | None | A2 | Human     |
| LA221 | PRJNA73043 | SAMN00779841 | 2002 | Netherlands | Infection | None | A2 | Human     |
| LA222 | PRJNA73043 | SAMN00779836 | 1981 | Netherlands | Unknown   | None | A2 | Non-human |
| LA223 | PRJNA73043 | SAMN00779828 | 1995 | Germany     | Unknown   | None | A2 | Non-human |
| LA224 | PRJNA73043 | SAMN00779830 | 1982 | Netherlands | Unknown   | None | A2 | Non-human |
| LA225 | PRJNA73043 | SAMN00779868 | 1995 | Spain       | Unknown   | None | A2 | Non-human |
| LA226 | PRJNA73043 | SAMN00779815 | 2002 | Netherlands | Screening | None | A2 | Human     |
| LA227 | PRJNA73043 | SAMN00779816 | 1995 | Belgium     | Unknown   | None | A2 | Non-human |
| LA228 | PRJNA73043 | SAMN00779831 | 1979 | Netherlands | Screening | None | A2 | Human     |

<sup>1</sup>The year of *E. faecium* isolation as indicated by participating collaborators. Sequences with unknown dates were excluded from the data if time was an analysis variable.

<sup>2</sup>The country from which the *E. faecium* isolate was obtained

<sup>3</sup>Origin of *E. faecium* isolate, screening or infection isolate.

<sup>4</sup>Clustering category using hBAPs relative to membership of sequences from project number PRJNA73043 and labelled (LA201-LA228, LB01-LB10). Clustering analysis was performed with and without the inclusion of non-human *E. faecium* sequences with concordant results (see text for details).

<sup>5</sup>Vancomycin resistance gene presence (specified by type *vanA* or *vanB*) or absence.

<sup>6</sup>Host of the *E. faecium* isolate. Non-human *E. faecium* sequences were excluded from subsequent analysis see text for details.

Supplementary Table 2: Gene proportions by hBAPs group

| Gene                      | Non.unique.Gene.name      | Annotation                                                                    | No. in A1 | No. in A2 | No. in B |
|---------------------------|---------------------------|-------------------------------------------------------------------------------|-----------|-----------|----------|
| group_7989                |                           | hypothetical protein                                                          | 20        | 60        | 38       |
| group_8484                |                           | hypothetical protein                                                          | 19        | 60        | 38       |
| group_6269                |                           | hypothetical protein                                                          | 19        | 59        | 38       |
| group_6268                |                           | hypothetical protein                                                          | 19        | 56        | 38       |
| hchA_2_hchA_1             | hchA_2;hchA_1             | Protein/nucleic acid deglycase 1                                              | 19        | 56        | 38       |
| group_5887                |                           | HTH-type transcriptional regulator                                            | 18        | 55        | 38       |
| epsH_2_epsJ_2_epsJ_epsJ_1 | epsH_2;epsJ_2;epsJ;epsJ_1 | Putative glycosyltransferase EpsH;putative glycosyltransferase EpsJ           | 28        | 58        | 19       |
| group_5508                |                           | hypothetical protein                                                          | 21        | 59        | 30       |
| group_8249                |                           | hypothetical protein                                                          | 38        | 55        | 14       |
| ptcA                      | ptcA                      | Putrescine carbamoyltransferase                                               | 29        | 53        | 17       |
| gadC_4_aguA               | gadC_4;aguA               | putative glutamate/gamma-aminobutyrate antiporter;Putative agmatine deiminase | 29        | 53        | 17       |
| group_5212                |                           | hypothetical protein                                                          | 22        | 63        | 9        |
| immA                      | ;immA                     | hypothetical protein;Metallopeptidase ImmA                                    | 22        | 62        | 9        |
| group_6160                |                           | hypothetical protein                                                          | 22        | 63        | 8        |
| group_8235                |                           | hypothetical protein                                                          | 19        | 53        | 17       |
| group_5211                |                           | hypothetical protein                                                          | 22        | 62        | 7        |
| group_6728                |                           | hypothetical protein                                                          | 23        | 51        | 7        |
| group_5618                |                           | hypothetical protein                                                          | 24        | 51        | 0        |
| group_3787                |                           | hypothetical protein                                                          | 24        | 50        | 0        |
| group_7955                |                           | hypothetical protein                                                          | 18        | 53        | 3        |
| group_99                  |                           | hypothetical protein                                                          | 11        | 57        | 0        |
| group_4206                |                           | hypothetical protein                                                          | 18        | 50        | 0        |
| group_5888                |                           | hypothetical protein                                                          | 16        | 49        | 0        |

|               |               |                                                                       |    |    |    |
|---------------|---------------|-----------------------------------------------------------------------|----|----|----|
| group_8469    |               | hypothetical protein                                                  | 28 | 39 | 30 |
| fetA          | fetA          | putative iron export ATP-binding protein FetA                         | 28 | 39 | 30 |
| fetB          | fetB          | putative iron export permease protein FetB                            | 28 | 39 | 30 |
| oatA_2        | oatA_2        | O-acetyltransferase OatA                                              | 46 | 25 | 20 |
| group_6325    |               | hypothetical protein                                                  | 45 | 22 | 20 |
| group_4213    |               | hypothetical protein                                                  | 43 | 6  | 37 |
| group_1415    |               | hypothetical protein                                                  | 43 | 6  | 37 |
| group_4573    |               | hypothetical protein                                                  | 9  | 31 | 38 |
| group_6956    |               | hypothetical protein                                                  | 34 | 21 | 20 |
| clpC_2        | clpC_2        | putative ATP-dependent Clp protease ATP-binding subunit               | 17 | 27 | 30 |
| lexA_2_lexA_1 | lexA_2;lexA_1 | LexA repressor                                                        | 22 | 27 | 24 |
| group_2425    |               | hypothetical protein                                                  | 6  | 27 | 38 |
| group_1735    |               | hypothetical protein                                                  | 14 | 26 | 28 |
| group_3167    |               | hypothetical protein                                                  | 20 | 28 | 23 |
| group_2700    |               | hypothetical protein                                                  | 6  | 26 | 38 |
| topB_4        | topB_4        | DNA topoisomerase 3                                                   | 21 | 28 | 20 |
| group_3663    |               | hypothetical protein                                                  | 21 | 28 | 20 |
| group_3566    |               | hypothetical protein                                                  | 20 | 28 | 22 |
| group_2235    |               | hypothetical protein                                                  | 20 | 28 | 22 |
| group_6439    | dexB          | Glucan 16-alpha-glucosidase                                           | 12 | 21 | 37 |
| group_2623    |               | hypothetical protein                                                  | 20 | 28 | 20 |
| group_2618    |               | hypothetical protein                                                  | 20 | 28 | 21 |
| group_1925    |               | hypothetical protein                                                  | 20 | 28 | 20 |
| group_4522    | treP_1        | PTS system trehalose-specific EIIBC component                         | 12 | 20 | 37 |
| metE_1        | metE_1        | 5-methyltetrahydropteroyltriglutamate--homocysteine methyltransferase | 6  | 24 | 37 |
| group_6200    |               | hypothetical protein                                                  | 4  | 22 | 37 |
| group_3269    |               | putative ABC transporter ATP-binding protein                          | 3  | 21 | 38 |



|                |                |                                                                                |    |    |    |
|----------------|----------------|--------------------------------------------------------------------------------|----|----|----|
| group_3171     | polC_3         | DNA polymerase III PolC-type                                                   | 18 | 22 | 24 |
| gmuE_1         | gmuE_1         | Putative fructokinase                                                          | 11 | 14 | 37 |
| group_1139     | purR_1         | HTH-type transcriptional repressor PurR                                        | 11 | 14 | 37 |
| scrB_1         | scrB_1         | Sucrose-6-phosphate hydrolase                                                  | 11 | 14 | 37 |
| xre_1_xre_immR | xre_1;xre;immR | HTH-type transcriptional regulator Xre;HTH-type transcriptional regulator ImmR | 5  | 20 | 36 |
| mapP_2         | mapP_2         | Maltose 6'-phosphate phosphatase                                               | 17 | 18 | 23 |
| ptsG_3         | ptsG_3         | PTS system glucose-specific EIICBA component                                   | 17 | 18 | 23 |
| group_4525     |                | putative ABC transporter ATP-binding protein                                   | 3  | 17 | 38 |
| cmtB           | cmtB           | Mannitol-specific cryptic phosphotransferase enzyme IIA component              | 15 | 8  | 34 |
| malP_3         | malP_3         | Maltose phosphorylase                                                          | 16 | 16 | 23 |
| mro_3          | mro_3          | Aldose 1-epimerase                                                             | 16 | 16 | 23 |
| pgmB_2         | pgmB_2         | Beta-phosphoglucomutase                                                        | 16 | 16 | 23 |
| group_5882     | manR_2;        | Transcriptional regulator ManR;hypothetical protein                            | 15 | 7  | 34 |
| group_7502     | ;phnN          | hypothetical protein;Ribose 15-bisphosphate phosphokinase PhnN                 | 16 | 3  | 38 |
| group_7993     | cspLA_2        | Cold shock-like protein CspLA                                                  | 6  | 9  | 38 |
| group_4994     |                | hypothetical protein                                                           | 5  | 14 | 36 |
| group_3283     |                | hypothetical protein                                                           | 6  | 11 | 35 |
| ulaB_1_ulaB_2  | ulaB_1;ulaB_2  | Ascorbate-specific PTS system EIIB component                                   | 11 | 8  | 34 |
| group_6739     |                | hypothetical protein                                                           | 2  | 13 | 38 |
| group_5588     |                | Putative membrane protein insertion efficiency factor                          | 10 | 6  | 37 |
| ulaA_2_ulaA_1  | ulaA_2;ulaA_1  | Ascorbate-specific PTS system EIIC component                                   | 9  | 8  | 34 |
| group_696      |                | hypothetical protein                                                           | 9  | 7  | 34 |
| group_7198     | xre_2;         | HTH-type transcriptional regulator Xre;hypothetical protein                    | 5  | 9  | 37 |
| group_6526     |                | Phosphorylated carbohydrates phosphatase                                       | 3  | 7  | 38 |
| group_5826     | yx1F           | putative ABC transporter ATP-binding protein Yx1F                              | 5  | 9  | 37 |
| manX_4_manX_1  | manX_4;manX_1  | PTS system mannose-specific EIIB component                                     | 3  | 7  | 38 |
| dgaR_1_dgaR_3  | dgaR_1;dgaR_3  | Transcriptional regulatory protein DagR                                        | 3  | 7  | 38 |

|                    |                     |                                                                                                  |    |    |    |
|--------------------|---------------------|--------------------------------------------------------------------------------------------------|----|----|----|
| group_4339         | sorA_3              | PTS system sorbose-specific EIIC component                                                       | 3  | 7  | 38 |
| group_2906         | frlB_1              | Fructosamine deglycase FrlB                                                                      | 3  | 7  | 38 |
| levD               | levD                | PTS system fructose-specific EIIA component                                                      | 3  | 7  | 38 |
| group_1106         |                     | hypothetical protein                                                                             | 5  | 9  | 37 |
| manZ_3             | manZ_3              | PTS system mannose-specific EIID component                                                       | 3  | 7  | 38 |
| group_988          |                     | hypothetical protein                                                                             | 5  | 9  | 37 |
| group_7292         | yvbK                | putative N-acetyltransferase YvbK                                                                | 6  | 6  | 37 |
| nikB               | nikB                | Nickel transport system permease protein NikB                                                    | 1  | 9  | 38 |
| group_2184         | oppD_3              | Oligopeptide transport ATP-binding protein OppD                                                  | 1  | 9  | 38 |
| oppC               | oppC                | Oligopeptide transport system permease protein OppC                                              | 1  | 9  | 38 |
| amiA_sarA          | amiA;sarA           | Oligopeptide-binding protein AmiA;Oligopeptide-binding protein SarA                              | 1  | 8  | 38 |
| group_5553         | nudC                | NADH pyrophosphatase                                                                             | 11 | 1  | 37 |
| group_4438         |                     | hypothetical protein                                                                             | 12 | 14 | 23 |
| oppF_3             | oppF_3              | Oligopeptide transport ATP-binding protein OppF                                                  | 1  | 8  | 38 |
| sipV               | sipV                | Signal peptidase I V                                                                             | 2  | 8  | 38 |
| thlA               | thlA                | Acetyl-CoA acetyltransferase                                                                     | 4  | 6  | 38 |
| plc_plcA           | plc;;plcA           | 1-phosphatidylinositol phosphodiesterase                                                         | 4  | 5  | 38 |
| group_5397         |                     | hypothetical protein                                                                             | 9  | 1  | 37 |
| group_4611         |                     | hypothetical protein                                                                             | 9  | 1  | 37 |
| group_3898         | celA_3              | PTS system cellobiose-specific EIIB component                                                    | 5  | 6  | 37 |
| group_1336         |                     | hypothetical protein                                                                             | 12 | 14 | 21 |
| ywqD_2             | ywqD_2              | Tyrosine-protein kinase YwqD                                                                     | 4  | 4  | 38 |
| group_7848         |                     | hypothetical protein                                                                             | 7  | 12 | 24 |
| mngA_mngA_1        | mngA;mngA_1         | PTS system 2-O-alpha-mannosyl-D-glycerate-specific EIIBC component                               | 7  | 12 | 24 |
| manP_5_fba_3_fba_1 | manP_5;fba_3;fba_1; | PTS system mannose-specific EIIBCA component;Fructose-bisphosphate aldolase;hypothetical protein | 7  | 12 | 24 |
| pepD               | pepD                | Dipeptidase                                                                                      | 3  | 6  | 37 |

|               |               |                                                                                            |   |    |    |
|---------------|---------------|--------------------------------------------------------------------------------------------|---|----|----|
| group_6224    |               | hypothetical protein                                                                       | 7 | 2  | 37 |
| abgT_2        | abgT_2        | p-aminobenzoyl-glutamate transport protein                                                 | 3 | 4  | 38 |
| pepV_1_pepV_2 | pepV_1;pepV_2 | Beta-Ala-Xaa dipeptidase                                                                   | 3 | 4  | 38 |
| kdgK_2        | kdgK_2        | 2-dehydro-3-deoxygluconokinase                                                             | 7 | 12 | 24 |
| dgaE          | dgaE          | D-glucosamine-6-phosphate ammonia lyase                                                    | 7 | 12 | 24 |
| hit_2_hit_1   | hit_2;hit_1   | Protein hit                                                                                | 1 | 5  | 38 |
| dgaF          | dgaF          | 2-dehydro-3-deoxy-phosphogluconate aldolase                                                | 7 | 12 | 24 |
| group_3718    | fieF          | Ferrous-iron efflux pump FieF                                                              | 3 | 4  | 38 |
| rnhA          | rnhA          | 14.7 kDa ribonuclease H-like protein                                                       | 3 | 4  | 38 |
| group_7309    |               | hypothetical protein                                                                       | 7 | 1  | 37 |
| group_7137    | wbbL          | N-acetylglucosaminyl-diphospho-decaprenol L-rhamnosyltransferase;Rhamnosyltransferase WbbL | 2 | 4  | 38 |
| group_6650    |               | Deacetylase                                                                                | 6 | 12 | 24 |
| group_6649    | licC_4        | Lichenan permease IIC component                                                            | 6 | 12 | 24 |
| group_5152    |               | hypothetical protein                                                                       | 7 | 1  | 37 |
| group_4935    |               | hypothetical protein                                                                       | 6 | 12 | 24 |
| group_6290    | kstR2         | HTH-type transcriptional repressor KstR2                                                   | 3 | 4  | 34 |
| chiA1         | chiA1         | Chitinase A1                                                                               | 3 | 4  | 34 |
| group_4493    |               | hypothetical protein                                                                       | 6 | 5  | 33 |
| bsr           | bsr           | Blasticidin-S deaminase                                                                    | 3 | 3  | 38 |
| group_1217    |               | hypothetical protein                                                                       | 3 | 3  | 38 |
| group_895     |               | hypothetical protein                                                                       | 8 | 14 | 23 |
| group_6023    |               | hypothetical protein                                                                       | 3 | 2  | 38 |
| group_5834    |               | hypothetical protein                                                                       | 1 | 3  | 38 |
| group_5105    |               | hypothetical protein                                                                       | 3 | 2  | 38 |
| group_5027    |               | hypothetical protein                                                                       | 1 | 3  | 38 |
| group_4381    | ybbH_2        | putative HTH-type transcriptional regulator YbbH                                           | 3 | 2  | 38 |
| group_4171    |               | hypothetical protein                                                                       | 2 | 5  | 35 |

|               |                |                                                                          |   |    |    |
|---------------|----------------|--------------------------------------------------------------------------|---|----|----|
| group_3374    |                | hypothetical protein                                                     | 3 | 2  | 38 |
| group_3373    | malX           | PTS system maltose-specific EIICB component                              | 3 | 2  | 38 |
| group_2345    | licC_6         | Lichenan permease IIC component                                          | 3 | 2  | 38 |
| srrB          | srrB           | Sensor protein SrrB                                                      | 1 | 3  | 38 |
| group_1045    |                | hypothetical protein                                                     | 1 | 3  | 38 |
| group_1039    |                | hypothetical protein                                                     | 1 | 4  | 38 |
| arIR_1        | arIR_1         | Response regulator ArIR                                                  | 1 | 3  | 38 |
| malY          | malY           | Protein MalY                                                             | 3 | 2  | 38 |
| group_6689    | xerC_3;        | Tyrosine recombinase XerC;hypothetical protein                           | 3 | 3  | 36 |
| group_5324    |                | hypothetical protein                                                     | 1 | 16 | 23 |
| purL          | purL           | Phosphoribosylformylglycinamide synthase subunit PurL                    | 3 | 1  | 38 |
| ptsG_2_ptsG_1 | ptsG_2;ptsG_1; | PTS system glucose-specific EIICBA component;hypothetical protein        | 3 | 1  | 37 |
| group_6648    |                | hypothetical protein                                                     | 1 | 3  | 36 |
| group_6220    |                | hypothetical protein                                                     | 1 | 3  | 36 |
| uvrA_1_uvrA_2 | uvrA_1;uvrA_2  | UvrABC system protein A                                                  | 1 | 2  | 38 |
| gmuC_1_gmuC_3 | gmuC_1;gmuC_3  | PTS system oligo-beta-mannoside-specific EII component                   | 1 | 2  | 38 |
| cysA          | cysA;          | Sulfate/thiosulfate import ATP-binding protein CysA;hypothetical protein | 1 | 2  | 38 |
| alsE          | alsE           | D-allulose-6-phosphate 3-epimerase                                       | 1 | 2  | 38 |
| group_4546    |                | hypothetical protein                                                     | 1 | 2  | 38 |
| group_4508    |                | Muramidase-2                                                             | 1 | 2  | 38 |
| group_4456    |                | hypothetical protein                                                     | 1 | 2  | 38 |
| ppm1_1        | ppm1_1         | Polyprenol monophosphomannose synthase                                   | 1 | 3  | 36 |
| murJ_3        | murJ_3         | Lipid II flippase MurJ                                                   | 1 | 1  | 39 |
| group_2319    |                | hypothetical protein                                                     | 1 | 1  | 39 |
| group_1399    | fruA_4         | PTS system fructose-specific EIIB'BC component                           | 1 | 2  | 38 |
| group_1332    |                | hypothetical protein                                                     | 2 | 1  | 38 |
| group_1113    | araC_1         | Arabinose operon regulatory protein                                      | 1 | 2  | 38 |

|               |                |                                                                 |   |    |    |
|---------------|----------------|-----------------------------------------------------------------|---|----|----|
| group_948     |                | hypothetical protein                                            | 6 | 12 | 20 |
| manP_1        | manP_1         | PTS system mannose-specific EIIBC component                     | 1 | 2  | 38 |
| czrA_2        | ;czrA_2        | hypothetical protein;HTH-type transcriptional repressor CzrA    | 1 | 2  | 37 |
| group_7637    |                | Putative trans-acting regulator                                 | 1 | 1  | 38 |
| group_7397    |                | hypothetical protein                                            | 2 | 1  | 37 |
| group_7368    |                | hypothetical protein                                            | 1 | 1  | 38 |
| group_7163    |                | hypothetical protein                                            | 1 | 1  | 38 |
| group_6780    |                | hypothetical protein                                            | 1 | 1  | 38 |
| agrA_2_agrA_3 | agrA_2;;agrA_3 | Accessory gene regulator A;hypothetical protein                 | 1 | 1  | 38 |
| group_6341    |                | Putative trans-acting regulator;hypothetical protein            | 1 | 1  | 38 |
| nox_3_nox_2   | nox_3;nox_2    | NADH oxidase                                                    | 3 | 5  | 29 |
| rluB_2        | rluB_2         | Ribosomal large subunit pseudouridine synthase B                | 1 | 1  | 38 |
| group_6049    |                | hypothetical protein                                            | 1 | 1  | 38 |
| group_5993    |                | hypothetical protein                                            | 1 | 1  | 38 |
| group_5972    |                | hypothetical protein                                            | 1 | 1  | 38 |
| group_5903    |                | hypothetical protein                                            | 1 | 1  | 38 |
| group_5889    | sorA_2;        | PTS system sorbose-specific EIIC component;hypothetical protein | 1 | 1  | 38 |
| group_5853    |                | hypothetical protein                                            | 1 | 1  | 38 |
| group_5739    |                | hypothetical protein                                            | 1 | 1  | 38 |
| group_5601    |                | hypothetical protein                                            | 1 | 1  | 38 |
| dnaJ_2        | dnaJ_2         | Chaperone protein DnaJ                                          | 2 | 1  | 37 |
| group_5524    |                | hypothetical protein                                            | 1 | 1  | 38 |
| group_5449    |                | hypothetical protein                                            | 1 | 1  | 38 |
| ydaF          | ydaF           | Putative ribosomal N-acetyltransferase YdaF                     | 1 | 1  | 38 |
| group_5297    |                | hypothetical protein                                            | 1 | 1  | 38 |
| group_5234    |                | hypothetical protein                                            | 1 | 1  | 38 |
| group_5233    | comGC          | ComG operon protein 3                                           | 1 | 1  | 38 |

|               |                |                                                                                        |   |    |    |
|---------------|----------------|----------------------------------------------------------------------------------------|---|----|----|
| ahpF_ahpF_1   | ahpF;ahpF_1    | NADH dehydrogenase;Alkyl hydroperoxide reductase subunit F                             | 2 | 0  | 38 |
| group_5194    | cutC           | Copper homeostasis protein CutC                                                        | 1 | 1  | 38 |
| manR_1_birA_2 | manR_1;birA_2; | Transcriptional regulator ManR;Bifunctional ligase/repressor BirA;hypothetical protein | 1 | 1  | 38 |
| rspR_1        | rspR_1         | HTH-type transcriptional repressor RspR                                                | 1 | 1  | 38 |
| group_5039    |                | hypothetical protein                                                                   | 1 | 1  | 38 |
| group_5008    |                | hypothetical protein                                                                   | 1 | 1  | 38 |
| comEC_comEC_1 | comEC;comEC_1  | ComE operon protein 3                                                                  | 1 | 1  | 38 |
| group_4950    |                | hypothetical protein                                                                   | 1 | 1  | 38 |
| chiD          | chiD           | Chitinase D                                                                            | 1 | 1  | 38 |
| group_4668    | yvoA_1         | HTH-type transcriptional repressor YvoA                                                | 1 | 1  | 38 |
| group_4610    |                | hypothetical protein                                                                   | 1 | 1  | 38 |
| group_4535    |                | hypothetical protein                                                                   | 1 | 1  | 38 |
| group_4430    | agrB_1         | Accessory gene regulator protein B                                                     | 1 | 1  | 38 |
| group_4305    | nadR           | Transcription repressor NadR                                                           | 1 | 1  | 38 |
| group_4246    |                | hypothetical protein                                                                   | 1 | 1  | 38 |
| group_4245    |                | hypothetical protein                                                                   | 1 | 1  | 38 |
| mapP_1        | mapP_1         | Maltose 6'-phosphate phosphatase                                                       | 2 | 1  | 37 |
| group_3865    |                | hypothetical protein                                                                   | 1 | 1  | 38 |
| group_3830    |                | DegV domain-containing protein                                                         | 1 | 1  | 38 |
| group_3812    |                | hypothetical protein                                                                   | 1 | 1  | 38 |
| sorA_4        | sorA_4         | PTS system sorbose-specific EIIc component                                             | 1 | 1  | 38 |
| group_3723    |                | Hyaluronate lyase                                                                      | 1 | 1  | 38 |
| ugl_1         | ugl_1          | Unsaturated chondroitin disaccharide hydrolase                                         | 1 | 1  | 38 |
| group_3634    |                | hypothetical protein                                                                   | 1 | 1  | 38 |
| group_3526    |                | hypothetical protein                                                                   | 3 | 13 | 22 |
| group_3508    |                | hypothetical protein                                                                   | 1 | 1  | 38 |
| group_3420    | manZ_2         | PTS system mannose-specific EIId component                                             | 1 | 1  | 38 |

|            |        |                                              |   |   |    |
|------------|--------|----------------------------------------------|---|---|----|
| group_3041 |        | hypothetical protein                         | 1 | 1 | 38 |
| group_3036 | ytIR   | Putative lipid kinase YtIR                   | 1 | 1 | 38 |
| esaA       | esaA   | ESAT-6 secretion accessory factor EsaA       | 1 | 2 | 37 |
| group_3012 |        | hypothetical protein                         | 1 | 1 | 38 |
| group_2579 |        | hypothetical protein                         | 1 | 1 | 38 |
| group_2522 |        | hypothetical protein                         | 1 | 1 | 38 |
| group_2495 |        | hypothetical protein                         | 1 | 1 | 38 |
| group_2403 | yqeN   | putative protein YqeN                        | 1 | 1 | 38 |
| group_2321 |        | putative ABC transporter permease            | 3 | 5 | 29 |
| group_2231 |        | hypothetical protein                         | 1 | 1 | 38 |
| group_1884 |        | hypothetical protein                         | 2 | 1 | 37 |
| group_1505 |        | hypothetical protein                         | 1 | 1 | 38 |
| manX_2     | manX_2 | PTS system mannose-specific EIIB component   | 1 | 1 | 38 |
| group_1385 |        | hypothetical protein                         | 1 | 1 | 38 |
| group_1213 |        | hypothetical protein                         | 2 | 1 | 37 |
| group_1169 |        | hypothetical protein                         | 1 | 1 | 38 |
| gbpA_2     | gbpA_2 | GlcNAc-binding protein A                     | 1 | 1 | 38 |
| recD2      | recD2  | ATP-dependent RecD-like DNA helicase         | 1 | 1 | 38 |
| comGA      | comGA  | ComG operon protein 1                        | 1 | 1 | 38 |
| group_784  | bga    | Beta-galactosidase                           | 1 | 1 | 38 |
| group_765  |        | hypothetical protein                         | 1 | 2 | 37 |
| group_469  |        | hypothetical protein                         | 1 | 1 | 38 |
| def1       | def1   | Peptide deformylase 1                        | 1 | 1 | 38 |
| group_68   |        | hypothetical protein                         | 1 | 2 | 37 |
| manP_2     | manP_2 | PTS system mannose-specific EIIBCA component | 1 | 1 | 37 |
| group_7165 |        | hypothetical protein                         | 1 | 1 | 37 |
| group_6688 |        | hypothetical protein                         | 3 | 4 | 33 |

|               |               |                                                               |   |   |    |
|---------------|---------------|---------------------------------------------------------------|---|---|----|
| group_6370    |               | hypothetical protein                                          | 3 | 3 | 34 |
| essB          | essB          | ESAT-6 secretion machinery protein EssB                       | 1 | 2 | 36 |
| group_5755    |               | hypothetical protein                                          | 0 | 1 | 38 |
| malP_2_malP_1 | malP_2;malP_1 | PTS system maltose-specific EIICB component                   | 1 | 2 | 36 |
| group_5719    |               | hypothetical protein                                          | 1 | 1 | 37 |
| group_5325    |               | hypothetical protein                                          | 1 | 0 | 38 |
| manP_3_manP_5 | manP_3;manP_5 | PTS system mannose-specific EIIBC component                   | 1 | 1 | 37 |
| group_3627    |               | hypothetical protein                                          | 1 | 1 | 37 |
| group_3410    |               | hypothetical protein                                          | 1 | 1 | 37 |
| ywqN          | ywqN          | Putative NAD(P)H-dependent FMN-containing oxidoreductase YwqN | 1 | 1 | 37 |
| group_2379    |               | 18 kDa heat shock protein                                     | 1 | 0 | 38 |
| group_1929    |               | hypothetical protein                                          | 1 | 0 | 38 |
| group_1621    |               | putative phosphotransferase enzyme IIB component              | 1 | 1 | 37 |
| esxA          | esxA          | ESAT-6 secretion system extracellular protein A               | 1 | 1 | 37 |
| group_749     | malL_3        | Oligo-16-glucosidase                                          | 9 | 0 | 30 |
| hepT          | hepT          | Heptaprenyl diphosphate synthase component 2                  | 0 | 1 | 38 |
| group_263     |               | hypothetical protein                                          | 1 | 0 | 38 |
| group_6669    |               | hypothetical protein                                          | 2 | 0 | 36 |
| essC_2_essC   | essC_2;essC   | ESAT-6 secretion machinery protein EssC                       | 1 | 1 | 36 |
| group_4622    | ugpQ          | Glycerophosphodiester phosphodiesterase cytoplasmic           | 1 | 0 | 36 |
| yjcS_2        | yjcS_2        | Putative alkyl/aryl-sulfatase YjcS                            | 2 | 0 | 36 |
| group_3265    |               | hypothetical protein                                          | 1 | 1 | 36 |
| group_2748    |               | hypothetical protein                                          | 1 | 0 | 37 |
| group_323     |               | hypothetical protein                                          | 1 | 1 | 36 |
| folT_1        | folT_1;       | Folate transporter FolT;hypothetical protein                  | 1 | 5 | 31 |
| group_6019    | relG          | Toxin RelG                                                    | 1 | 4 | 32 |
| malH          | malH          | Maltose-6'-phosphate glucosidase MalH                         | 1 | 2 | 34 |



|             |             |                                                               |   |   |    |
|-------------|-------------|---------------------------------------------------------------|---|---|----|
| glvR_1      | glvR_1      | HTH-type transcriptional regulator GlvR                       | 1 | 2 | 34 |
| group_3194  |             | Pesticidal crystal protein Cry22Aa                            | 1 | 1 | 35 |
| group_2252  |             | hypothetical protein                                          | 1 | 1 | 35 |
| group_252   |             | hypothetical protein                                          | 1 | 1 | 35 |
| sorA_1      | sorA_1      | PTS system sorbose-specific EIIC component                    | 1 | 4 | 30 |
| manZ_1      | manZ_1      | PTS system mannose-specific EIIC component                    | 1 | 4 | 30 |
| group_90    |             | hypothetical protein                                          | 1 | 4 | 30 |
| group_6163  |             | hypothetical protein                                          | 1 | 2 | 32 |
| group_6134  |             | hypothetical protein                                          | 1 | 2 | 32 |
| group_6051  |             | hypothetical protein                                          | 1 | 2 | 32 |
| group_4716  |             | hypothetical protein                                          | 5 | 6 | 25 |
| group_6181  |             | hypothetical protein                                          | 1 | 4 | 29 |
| group_5737  |             | hypothetical protein                                          | 0 | 2 | 32 |
| group_5359  |             | hypothetical protein                                          | 1 | 2 | 32 |
| ecfT_2      | ecfT_2      | Energy-coupling factor transporter transmembrane protein EcfT | 1 | 4 | 29 |
| ykoD        | ykoD        | Putative HMP/thiamine import ATP-binding protein YkoD         | 1 | 4 | 29 |
| group_4930  |             | hypothetical protein                                          | 2 | 0 | 31 |
| group_4306  |             | hypothetical protein                                          | 1 | 1 | 31 |
| group_1726  |             | hypothetical protein                                          | 1 | 1 | 31 |
| group_503   |             | hypothetical protein                                          | 1 | 1 | 31 |
| group_6487  | purQ        | Phosphoribosylformylglycinamide synthase subunit PurQ         | 2 | 0 | 30 |
| group_6018  |             | hypothetical protein                                          | 1 | 2 | 30 |
| group_5852  |             | hypothetical protein                                          | 1 | 1 | 29 |
| rafB_rafB_1 | rafB;rafB_1 | Raffinose permease                                            | 1 | 1 | 29 |
| group_2759  |             | hypothetical protein                                          | 1 | 1 | 29 |
| group_2749  |             | Extracellular exo-alpha-(1->5)-L-arabinofuranosidase          | 1 | 1 | 29 |
| group_2409  |             | hypothetical protein                                          | 1 | 1 | 29 |

|                             |                              |                                                                                                                                               |   |   |    |
|-----------------------------|------------------------------|-----------------------------------------------------------------------------------------------------------------------------------------------|---|---|----|
| group_2177                  |                              | hypothetical protein                                                                                                                          | 1 | 1 | 29 |
| group_795                   |                              | hypothetical protein                                                                                                                          | 1 | 1 | 29 |
| group_7944                  |                              | hypothetical protein                                                                                                                          | 1 | 1 | 30 |
| group_7166                  |                              | hypothetical protein                                                                                                                          | 5 | 3 | 23 |
| group_5471                  |                              | hypothetical protein                                                                                                                          | 1 | 0 | 31 |
| group_677                   |                              | hypothetical protein                                                                                                                          | 1 | 0 | 31 |
| group_6972                  |                              | hypothetical protein                                                                                                                          | 1 | 1 | 29 |
| group_4807                  | hrtA_2                       | Putative hemin import ATP-binding protein HrtA                                                                                                | 0 | 3 | 25 |
| group_2310                  |                              | putative ABC transporter permease                                                                                                             | 0 | 3 | 25 |
| group_1402                  |                              | hypothetical protein                                                                                                                          | 0 | 3 | 25 |
| group_138                   |                              | hypothetical protein                                                                                                                          | 1 | 1 | 27 |
| group_5463                  |                              | hypothetical protein                                                                                                                          | 1 | 0 | 28 |
| xerC_3__IntTn_xerD_1_xerC_1 | xerC_3;;Int-Tn;xerD_1;xerC_1 | Tyrosine recombinase XerC;Putative prophage phiRv2 integrase;hypothetical protein;Transposase from transposon Tn916;Tyrosine recombinase XerD | 0 | 4 | 21 |
| group_3876                  |                              | hypothetical protein                                                                                                                          | 0 | 0 | 26 |
| rppH                        | rppH                         | RNA pyrophosphohydrolase                                                                                                                      | 0 | 0 | 24 |
| group_5760                  |                              | hypothetical protein                                                                                                                          | 1 | 1 | 22 |
| yknY_2_yxdL_1               | yknY_2;yxdL_1                | putative ABC transporter ATP-binding protein YknY;ABC transporter ATP-binding protein YxdL                                                    | 1 | 0 | 25 |
| group_4280                  |                              | hypothetical protein                                                                                                                          | 0 | 0 | 24 |
| group_2407                  |                              | hypothetical protein                                                                                                                          | 0 | 1 | 25 |
| group_2176                  |                              | hypothetical protein                                                                                                                          | 0 | 1 | 25 |
| group_8179                  |                              | hypothetical protein                                                                                                                          | 1 | 0 | 24 |
| group_6964                  |                              | hypothetical protein                                                                                                                          | 0 | 0 | 20 |
